# Supplementary material
Source: Royal Society of Chemistry journal article supplement (doi:10.1039/d5cp05064b)
Supplement: d5cp05064b1.pdf [file d5cp05064b1.pdf]

## **Electronic supplementary information**

### **Aggregation-induced and stimuli-responsive emission modulation in pyridil-imidazole compounds connected to naphthalene, anthracene and pyrene for the design of sensors and switches**

**Tuhin Abedin<sup>†</sup>, Raju Biswas<sup>†</sup>, Sourav Mardanya<sup>†‡</sup>, and Sujoy Baitalik<sup>\*†</sup>**

---

<sup>†</sup>Department of Chemistry, Inorganic Chemistry Section, Jadavpur University, Kolkata 700032, India.

<sup>‡</sup> Department of Chemistry, Deshabandhu Mahavidyalaya, Paschim Bardhaman, West Bengal, Pin-713331, India

---

*\* To whom correspondence should be addressed: E-mail: [sbaitalik@hotmail.com](mailto:sbaitalik@hotmail.com), [sujoy.baitalik@jadavpuruniversity.in](mailto:sujoy.baitalik@jadavpuruniversity.in)*

## Table of contents

|                                                                              |                          |
|------------------------------------------------------------------------------|--------------------------|
| Synthetic details.....                                                       | Page 3-4                 |
| Experimental section.....                                                    | Page 5                   |
| Theoretical section.....                                                     | Page 6                   |
| <sup>1</sup> H NMR Spectra.....                                              | Fig. S1-S2, S5-S6&S9-S10 |
| COSY Spectra.....                                                            | Fig. S3, S7& S11         |
| <sup>13</sup> C NMR Spectra.....                                             | Fig. S4, S8&S12          |
| IR Spectra.....                                                              | Fig. S13                 |
| HRMS spectra.....                                                            | Fig. S14-S16             |
| DFT Calculations (Composition table) .....                                   | Table S1-S3              |
| Solvent dependent absorbance spectra.....                                    | Fig. S17                 |
| Lippen-Mataga plot.....                                                      | Fig. S18                 |
| DFT Calculations (UV table) .....                                            | Table S4-S6              |
| Solvent dependent lifetime spectra.....                                      | Fig. S19                 |
| Aggregation-induced emission.....                                            | Fig. S20                 |
| DLS spectra.....                                                             | Fig. S21                 |
| Temperature-dependent lifetime.....                                          | Fig. S22                 |
| Absorbance and Emission spectra of different anions.....                     | Fig. S23                 |
| Absorbance and Emission spectra in presence of OH <sup>-</sup> in MeCN.....  | Fig. S24                 |
| Absorbance and Emission spectra in presence of CN <sup>-</sup> in MeCN.....  | Fig. S25                 |
| Absorbance and Emission spectra in presence of CN <sup>-</sup> in water..... | Fig. S26                 |
| Binding Constants and Detection limit for F <sup>-</sup> .....               | Fig. S27-S28             |
| lifetime spectra of F <sup>-</sup> in MeCN.....                              | Fig. S29                 |
| lifetime spectra of CN <sup>-</sup> in MeCN.....                             | Fig. S30                 |
| lifetime spectra of CN <sup>-</sup> in H <sub>2</sub> O.....                 | Fig. S31                 |
| Absorbance and Emission spectra of different acids.....                      | Fig. S32                 |
| lifetime spectra of H <sup>+</sup> in MeCN.....                              | Fig. S33                 |
| Detection limit for HClO <sub>4</sub> .....                                  | Fig. S34                 |

## 1.1 Synthesis of the compounds

The general procedure followed for the synthesis of the desired compounds is described below.

**2-(2-(naphthalen-2-yl)-5-(pyridin-2-yl)-1H-imidazol-4-yl) pyridine (dipy-phimz-naphthalen):** 2,2'-Pyridil (100 mg, 0.47 mmol) and 2-naphthaldehyde (73 mg, 0.47 mmol) were dissolved in 50 mL of chloroform. Ammonium acetate (8.5 g) and acetic acid (10 mL) were added to this solution, and the mixture was refluxed for approximately 5 h. After cooling to room temperature, the reaction mixture was neutralized by the dropwise addition of a saturated sodium carbonate solution. The organic layer was separated using a separating funnel, and the solvent was removed under reduced pressure using a rotary evaporator. The crude product was purified by recrystallization from a 1:1 ethanol-methanol mixture, yielding the desired compound. Yield: 178 mg (51%). Elemental Anal. Calcd for C<sub>24</sub>H<sub>19</sub>N<sub>4</sub>: C, 79.31; H, 5.27; N, 15.42. Found: C, 79.19; H, 5.23; N, 15.11. <sup>1</sup>H NMR (400 MHz, DMSO-*d*<sub>6</sub>): δ/ppm 10.80 (*s*, N-H), 9.12 (*d*, 2H, *J*=4Hz, 2H<sub>6</sub>), 8.78 (*s*, 1H, *J*=8Hz, H<sub>9</sub>), 8.69(*d*, 2H, *J*=8Hz, 2H<sub>3</sub>), 8.48 (*t*, 2H, *J*=8Hz, 2H<sub>5</sub>), 8.33(*d*, 1H, *J*=12Hz, H<sub>14</sub>), 8.12 (*d*, 1H, *J*=12Hz, H<sub>13</sub>). 8.05 (*m*, 1H, *J*=12Hz, H<sub>12</sub>), 8.01 (*m*, 1H, *J*=4 Hz, H<sub>11</sub>), 7.86 (*t*, 2H, *J*=8.0 Hz, 2H<sub>4</sub>), 7.63 (*m*, 1H, *J*=4.0 Hz, H<sub>10</sub>), ESI-MS (positive, MeCN) *m/z* = 349.1454 (100%) [(1+H<sup>+</sup>)]. <sup>13</sup>C NMR (400 MHz, DMSO) δ: 149.20, 145.64, 144.13, 143.00, 133.67, 132.77, 128.88, 128.70, 128.18, 127.82, 127.49, 125.95, 125.72, 124.83, 123.85, 123.16, 39.93, 39.72, 39.51, 39.30, 39.09, 38.88, 38.67.

**2-(2-(anthracen-9-yl)-5-(pyridin-2-yl)-1H-imidazol-4-yl) pyridine (dipy-phimz-anthracen):** The compound is synthesized by adopting the same procedure as above, except by using 9-anthracenealdehyde (97 mg, 0.47 mmol) in place of 2-naphthaldehyde. Yield: 239 mg (56%). Elemental anal. Calcd. for C<sub>27</sub>H<sub>18</sub>N<sub>4</sub>: C, 81.39; H, 4.55; N, 14.06. Found: C,

81.22; H, 4.45; N, 13.80. <sup>1</sup>H NMR (400 MHz, DMSO-*d*<sub>6</sub>): δ/ppm 11.40 (*s*, N-H), 9.20 (*d*, 2H, *J*=4Hz, 2H<sub>6</sub>), 8.95 (*s*, 1H, *J*=12Hz, H<sub>13</sub>), 8.55 (*s*, 1H, *J*=8Hz, 1H<sub>9</sub>), 8.44 (*t*, 2H, *J*=8Hz, 2H<sub>5</sub>), 8.28 (*d*, 2H, *J*=12Hz, 2H<sub>3</sub>), 7.89 (*t*, 2H, *J*=8Hz, H<sub>4</sub>). 7.81 (*d*, 1H, *J*=8Hz, H<sub>12</sub>), 7.62 (*m*, 2H, *J*=8 Hz, H<sub>10</sub> +H<sub>11</sub>), ESI-MS (positive, MeCN) *m/z* = 399.1611 (100%) [(2+H<sup>+</sup>)]. <sup>13</sup>C NMR (400 MHz, DMSO) δ: 194.79, 147.60, 146.19, 144.51, 143.37, 135.86, 131.26, 131.05, 130.07, 129.96, 129.81, 129.13, 127.89, 126.41, 126.38, 125.48, 124.97, 123.72, 123.67, 123.15, 39.89, 39.68, 39.47, 39.26, 39.05, 38.84, 38.63.

**2-(2-(pyren-8-yl)-5-(pyridin-2-yl)-1H-imidazol-4-yl)pyridine (dipy-phimz-pyren):**

The compound is synthesized by adopting the same procedure as above, except by using 1-Pyrenecarboxaldehyde (108 mg, 0.47 mmol) in place of 2-naphthaldehyde. Yield: 241 mg (57%). Elemental anal. Calcd. for C<sub>29</sub>H<sub>20</sub>N<sub>4</sub>: C, 82.05; H, 4.75; N, 13.20. Found: C, 81.92; H, 4.67; N, 13.04. <sup>1</sup>H NMR (400 MHz, DMSO-*d*<sub>6</sub>): δ/ppm 10.85 (*s*, N-H), 9.15 (*d*, 2H, *J*=4Hz, 2H<sub>6</sub>), 9.12 (*d*, 1H, *J*=12Hz, H<sub>17</sub>), 8.68 (*d*, 1H, *J*=8Hz, 1H<sub>16</sub>), 8.58 (*d*, 2H, *J*=8Hz, 2H<sub>3</sub>), 8.47 (*m*, 3H, *J*=8Hz,4Hz, H<sub>11</sub>, H<sub>12</sub>, H<sub>13</sub>), 8.35 (*m*, 4H, *J*=,4Hz,8Hz,12Hz, H<sub>9</sub>, H<sub>10</sub>, H<sub>14</sub>, H<sub>15</sub>). 8.17 (*t*, 2H, *J*=8Hz, 2H<sub>5</sub>), 7.89 (*t*, 2H, *J*=8 Hz, H<sub>4</sub>), ESI-MS (positive, MeCN) *m/z* = 423.1609 (100%) [(3+H<sup>+</sup>)]. <sup>13</sup>C NMR (400 MHz, DMSO) δ: 194.28, 149.68, 143.17, 132.37, 131.26, 130.64, 129.30, 129.24, 129.10, 128.05, 127.74, 127.28, 126.63, 126.27, 125.26, 125.15, 124.90, 124.54, 123.97, 123.44, 123.14, 40.45, 40.24, 40.14, 40.03, 39.82, 39.61, 39.40, 39.20.

## 2. Experimental section

### 2.1 Physical measurements

<sup>1</sup>H-NMR spectra were recorded using a Bruker Avance DPX 400MHz spectrometer with DMSO-*d*<sub>6</sub> as the solvent. HRMS data were acquired from Waters mass spectrometer. Infrared spectra of the compounds were recorded in the range of 4000 cm<sup>-1</sup> to 400 cm<sup>-1</sup> with a Perkin-Elmer FT-IR spectrometer (spectrum two) with the samples following the attenuated total reflectance (ATR) technique. Elemental analyses of the compounds were performed with a Vario-Micro V2.0.11 elemental (CHNSO) analyzer. UV-visible absorption spectra were measured using a Shimadzu UV-1800 spectrophotometer. Steady-state fluorescence emission spectra were acquired on a HORIBA fluoromax-4 spectrometer. Luminescence lifetimes were measured at room temperature using the time-correlated single-photon counting (TCSPC) technique. For TCSPC measurements, photoexcitation was performed at 355 nm using a nanosecond diode laser. The luminescence decay data were collected with a Hamamatsu MCP photomultiplier (R3809) and analyzed using IBH DAS6 software. All solvatochromic photophysical studies were conducted using compounds at concentrations of approximately ~2×10<sup>-5</sup> M. The relative quantum yields of all four compounds (**1-3**) at room temperature were measured, using quinine sulfate in 1 N H<sub>2</sub>SO<sub>4</sub> (η = 1.338, Φ<sub>r</sub> = 54.6%) as the reference. The quantum yields were calculated using a general equation (S1) where ‘r’ denotes the reference and ‘s’ the sample. In this equation, ‘A’ refers to the absorbance at the excitation wavelength, ‘I’ represents the integrated luminescence intensity, and ‘η’ is the refractive index of the solvent. SEM data were recorded in a FEI INSPECT F50 instrument.

$$\frac{\Phi_s}{\Phi_r} = \frac{A_r \eta_s^2 I_s}{A_s \eta_r^2 I_r} \quad \dots(S1)$$

## 2.2 Computational details

All calculations were performed with the Gaussian 09 program<sup>S1</sup> package employing the DFT method with Becke's three-parameter hybrid functional and Lee-Yang-Parr's gradient corrected correlation functional (B3LYP) level of theory using 631-G basis set for the ligands<sup>S2,S3</sup> dipy-phimz-X (**1-3**). To compute the UV-vis absorption transitions of the compounds, the singlet state geometries corresponding to the vertical excitations were optimized using the time-dependent DFT (TD-DFT) scheme starting with the ground state geometries optimized in solution phase.<sup>S4-S9</sup> Orbital and fractional contribution analysis were done with Gauss View<sup>S10</sup> and Gauss Sum 2.1.<sup>S11</sup>

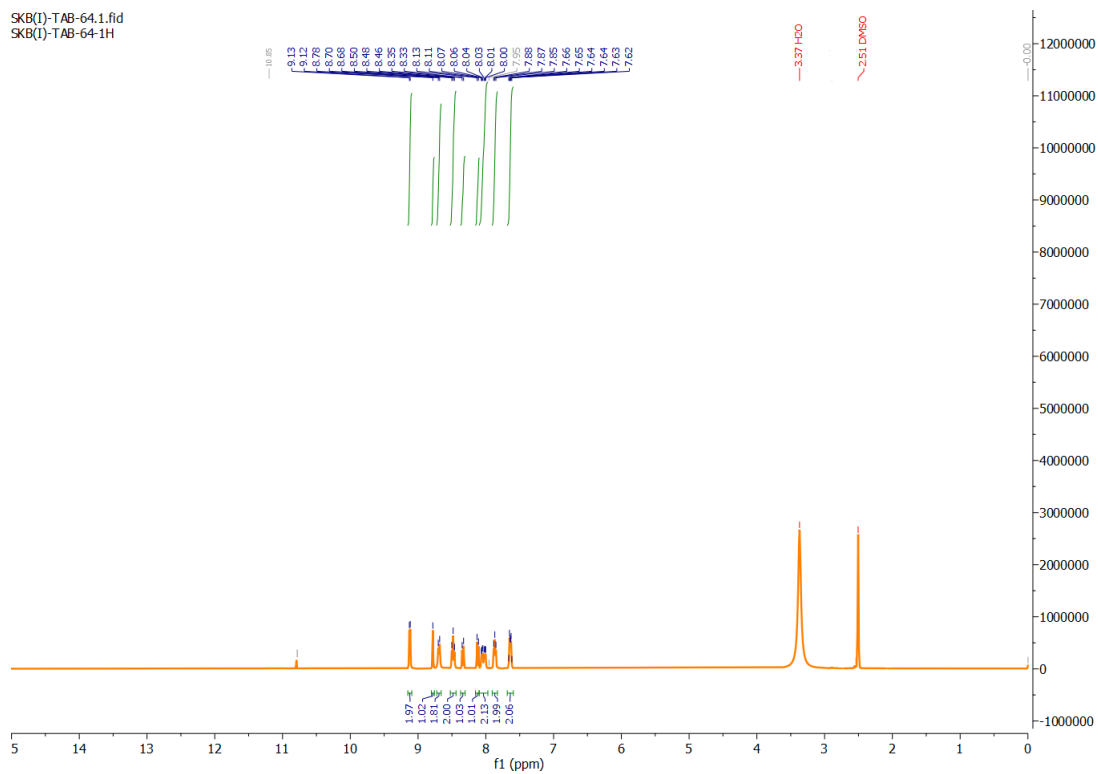

**Fig. S1** Full range  $^1\text{H-NMR}$  (400MHz) spectrum of **1** in  $\text{DMSO-}d_6$ .

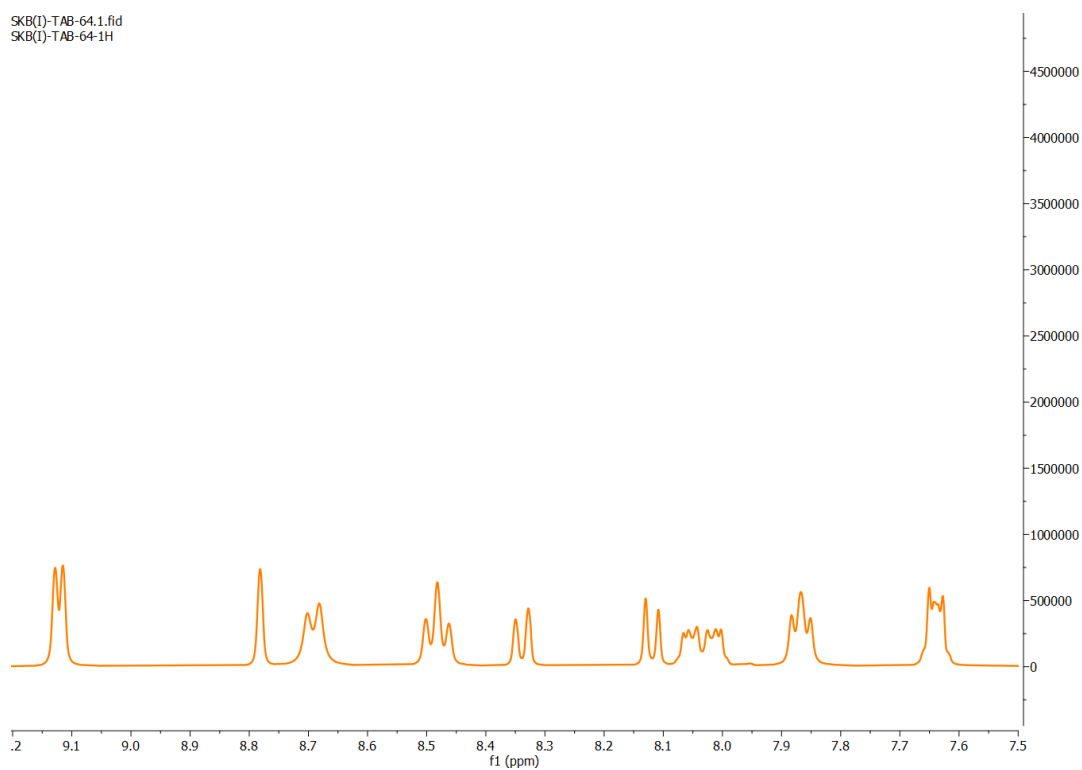

**Fig. S2** Expanded  $^1\text{H-NMR}$  (400MHz) spectrum of **1** in  $\text{DMSO-}d_6$ .

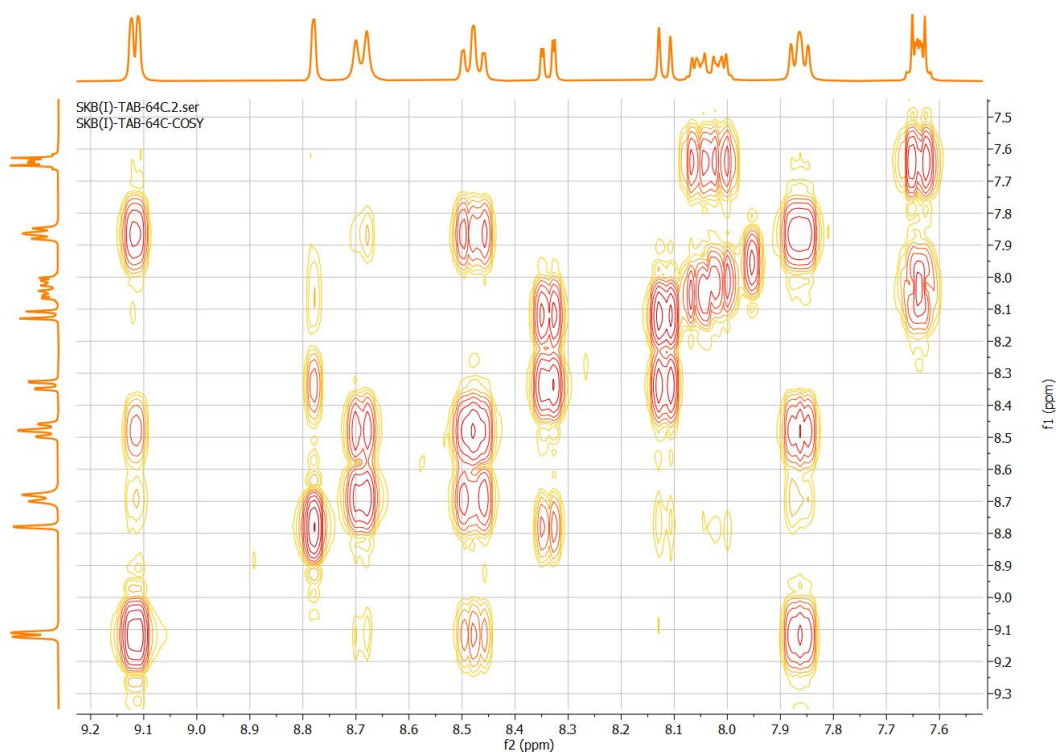

**Fig. S3**  $\{^1\text{H}-^1\text{H}\}$  COSY NMR spectrum of **1** in  $\text{DMSO}-d_6$ .

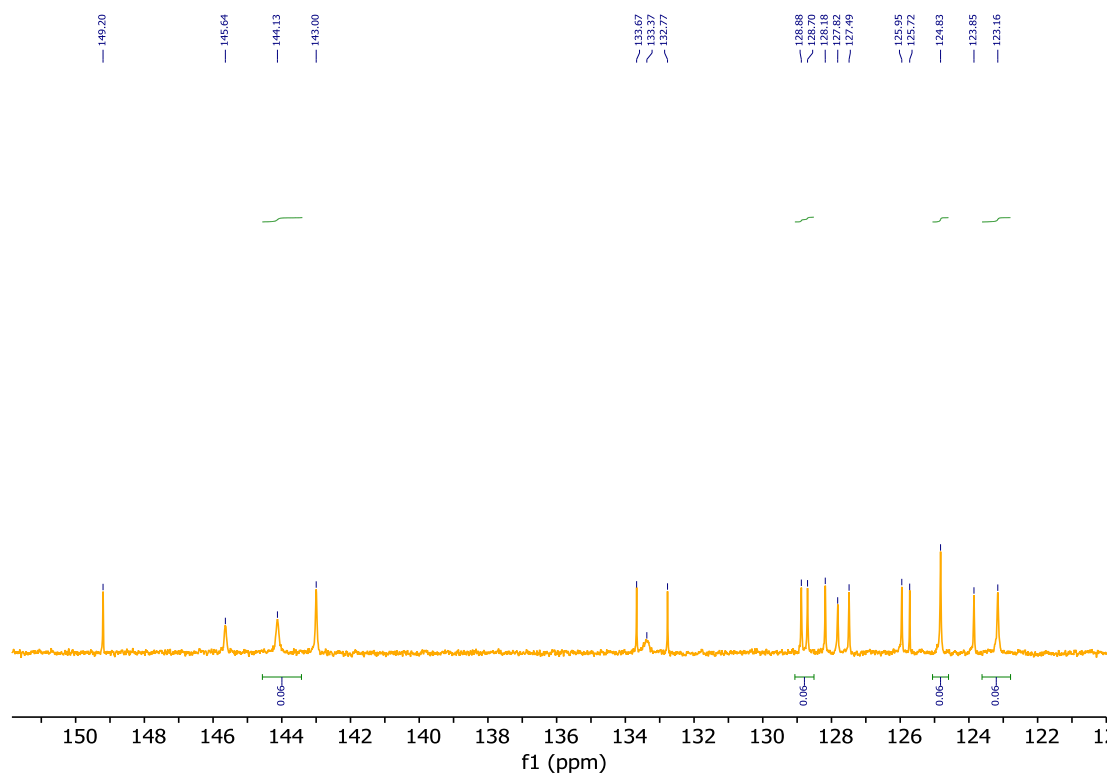

**Fig. S4**  $^{13}\text{C}$  NMR spectrum of **1** in  $\text{DMSO}-d_6$ .

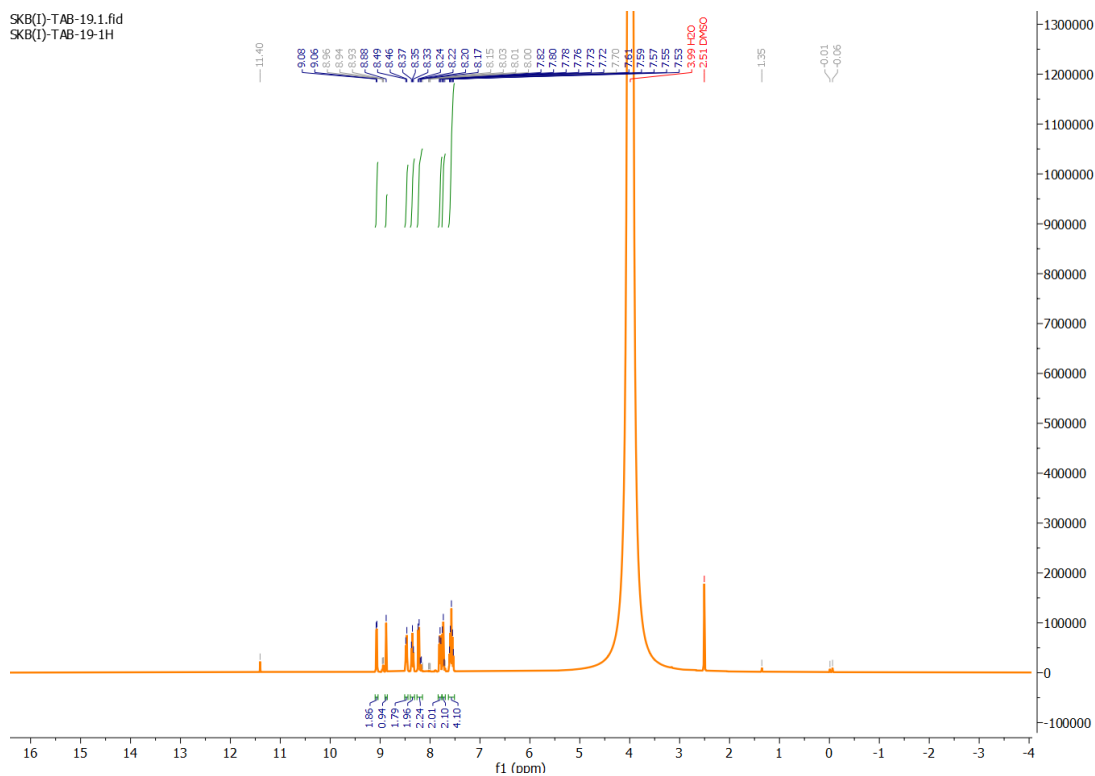

**Fig. S5** Full range  $^1\text{H-NMR}$  (400MHz) spectrum of **2** in  $\text{DMSO-}d_6$ .

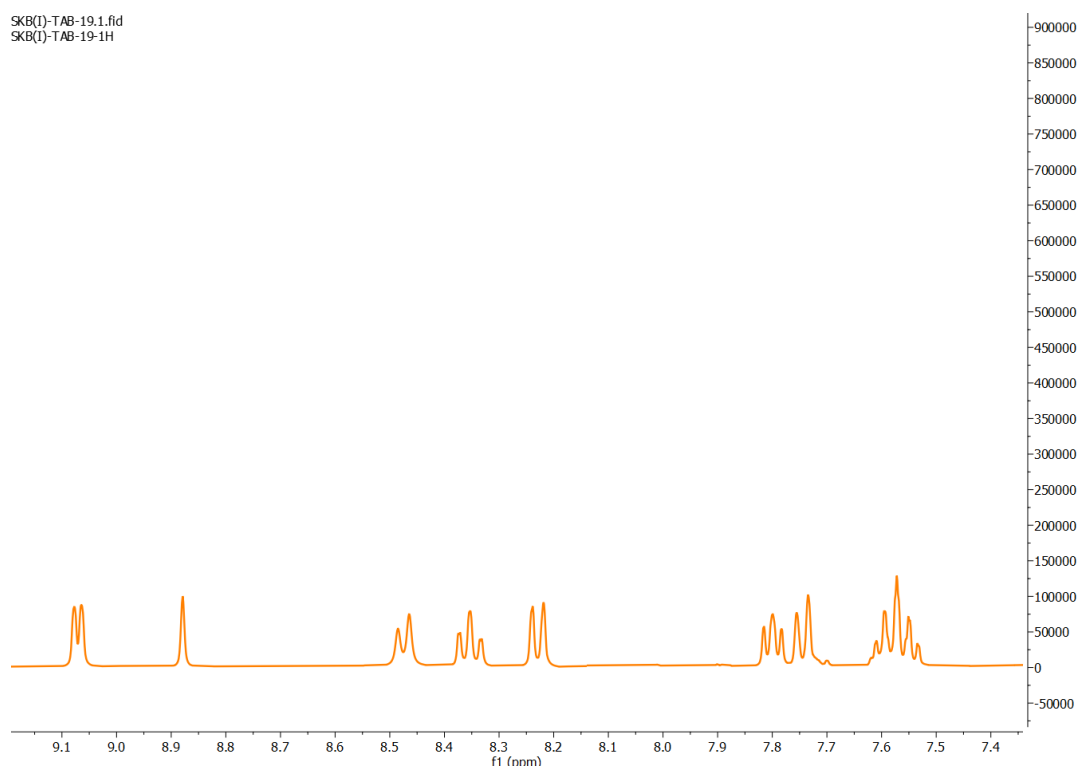

**Fig. S6** Expanded  $^1\text{H-NMR}$  (400MHz) spectrum of **2** in  $\text{DMSO-}d_6$ .

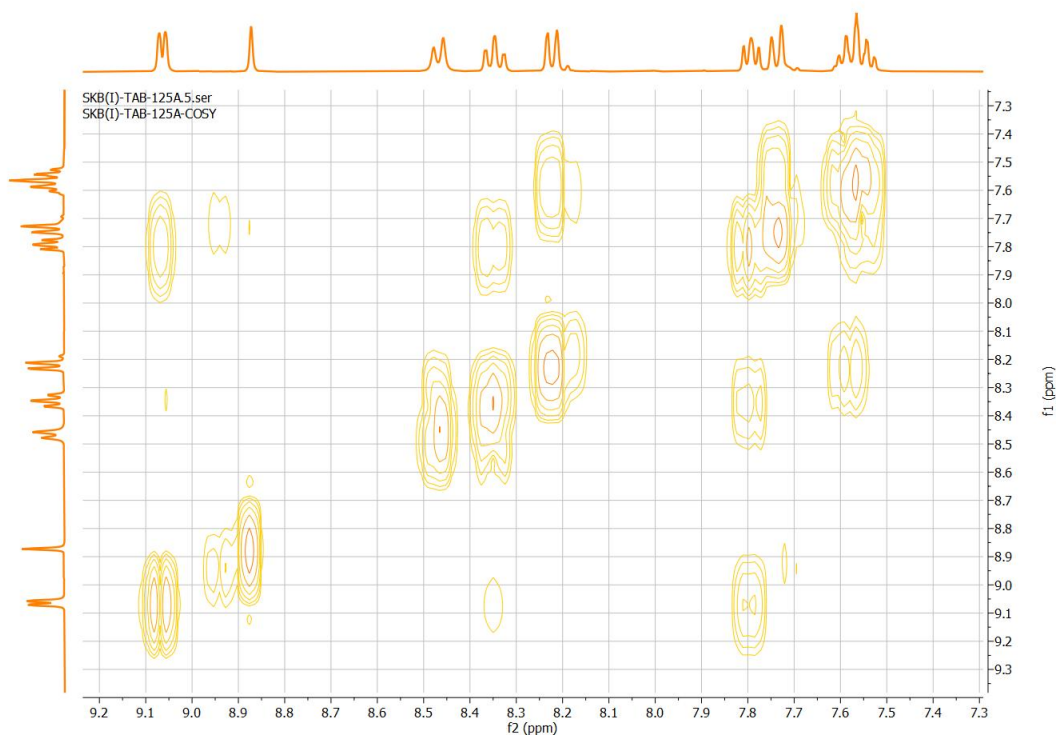

**Fig. S7**  $\{^1\text{H}-^1\text{H}\}$  COSY NMR spectrum of **2** in  $\text{DMSO}-d_6$ .

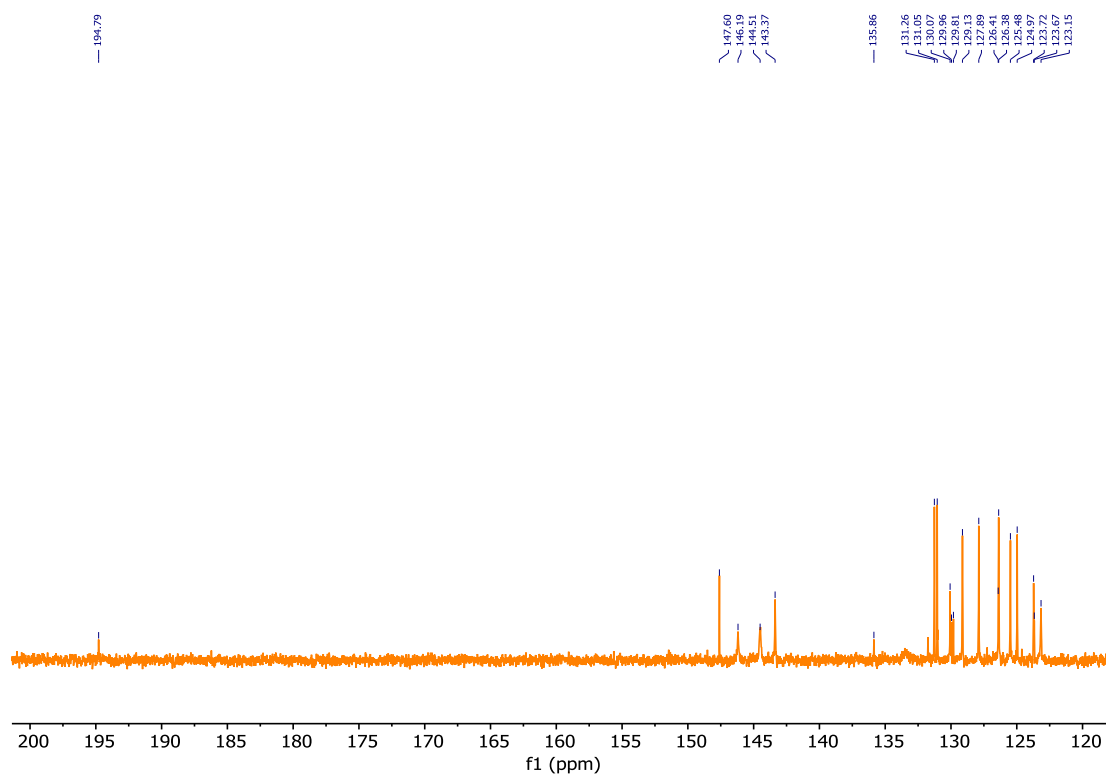

**Fig. S8**  $^{13}\text{C}$  NMR spectrum of **2** in  $\text{DMSO}-d_6$ .

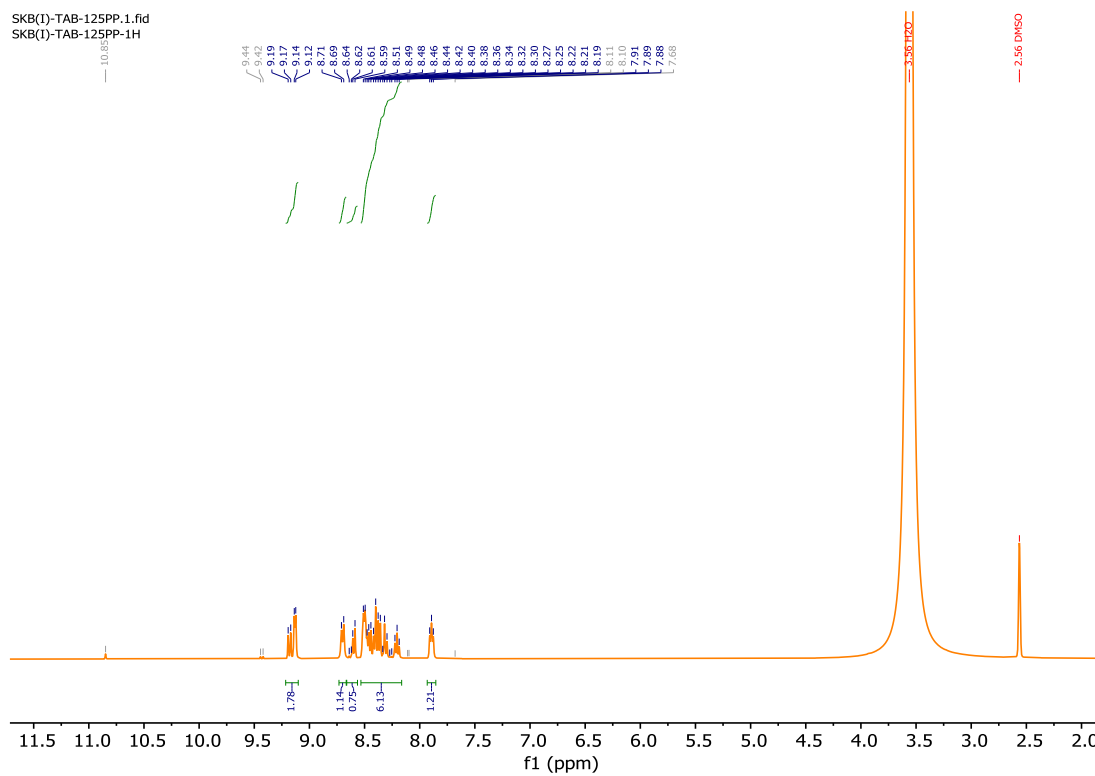

**Fig. S9** Full range  $^1\text{H-NMR}$  (400MHz) spectrum of **3** in  $\text{DMSO-}d_6$ .

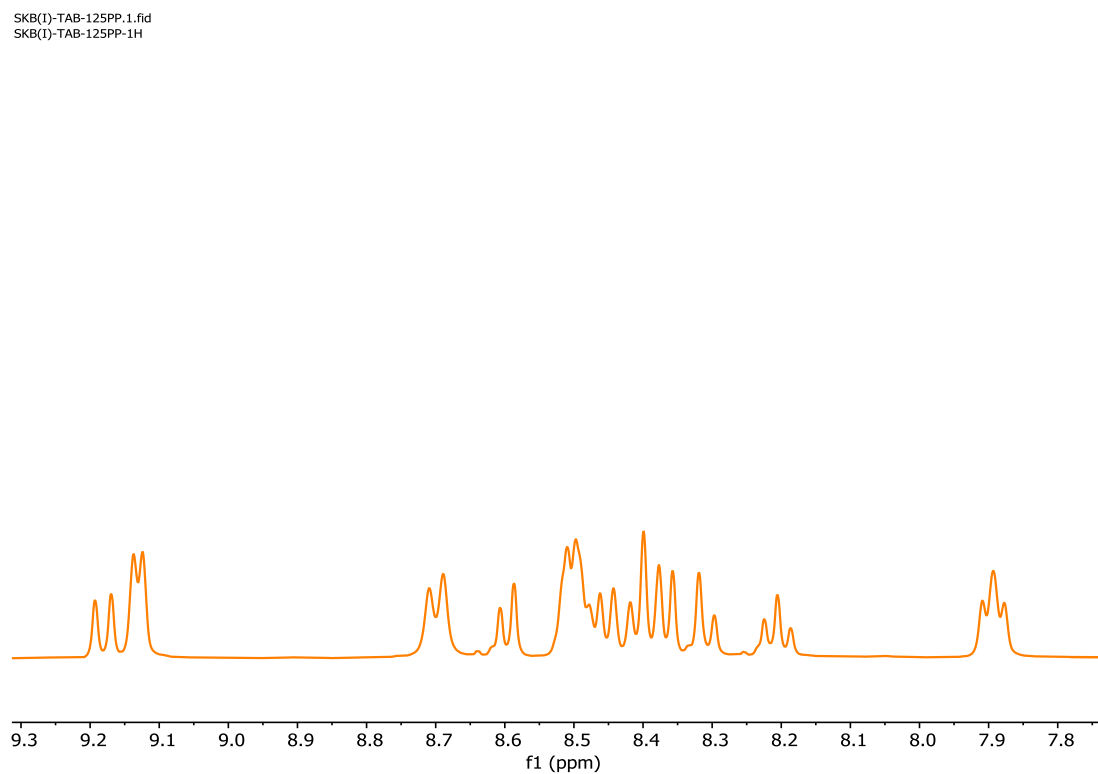

**Fig. S10** Expanded  $^1\text{H-NMR}$  (400MHz) spectrum of **3** in  $\text{DMSO-}d_6$ .

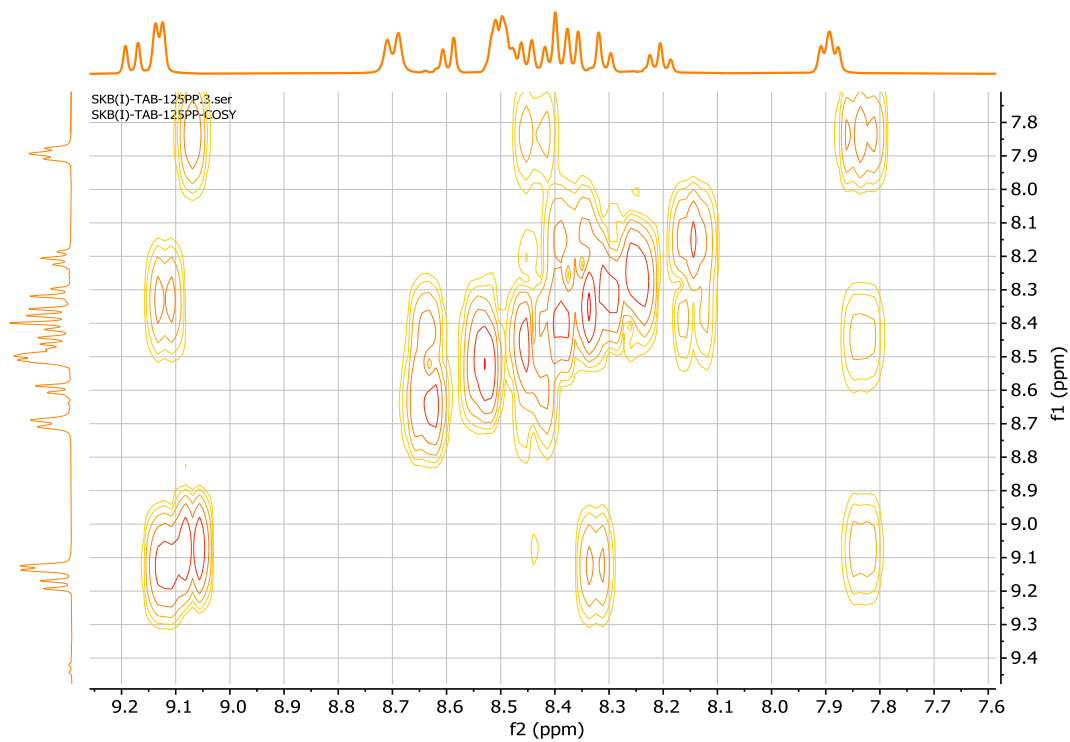

**Fig. S11**  $\{^1\text{H}-^1\text{H}\}$  COSY NMR spectrum of **3** in  $\text{DMSO}-d_6$ .

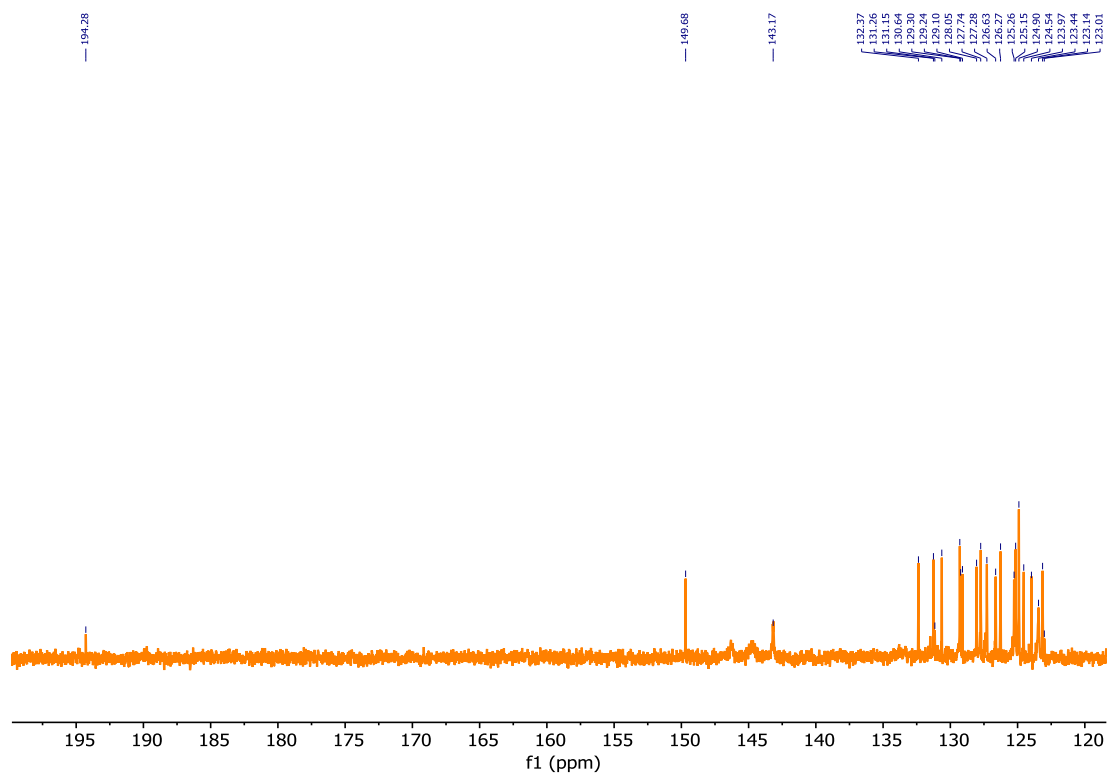

**Fig. S12**  $^{13}\text{C}$  NMR spectrum of **3** in  $\text{DMSO}-d_6$ .

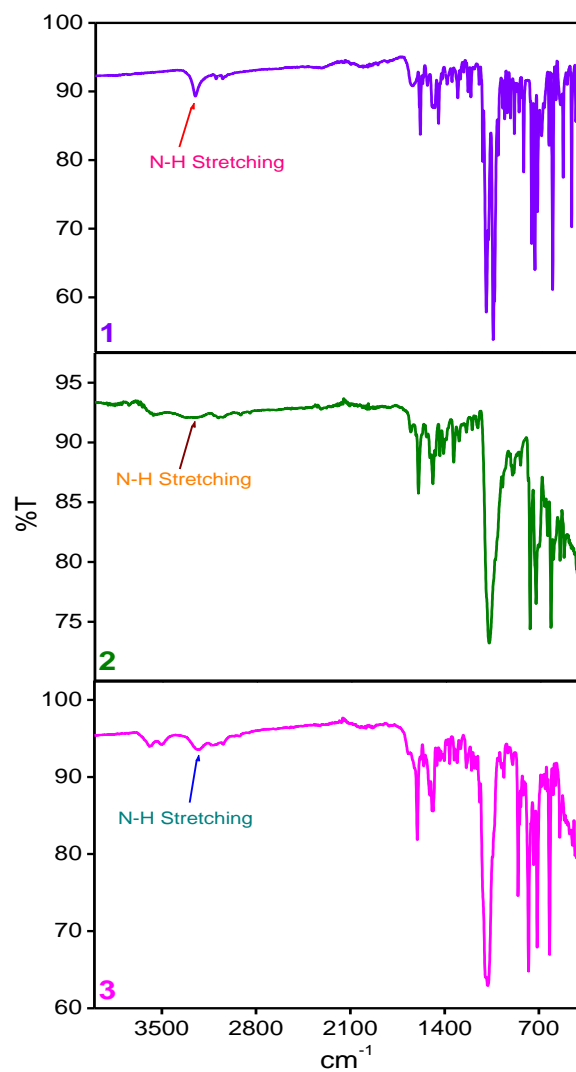

**Fig. S13** FT-IR spectrum of compound **1-3**.

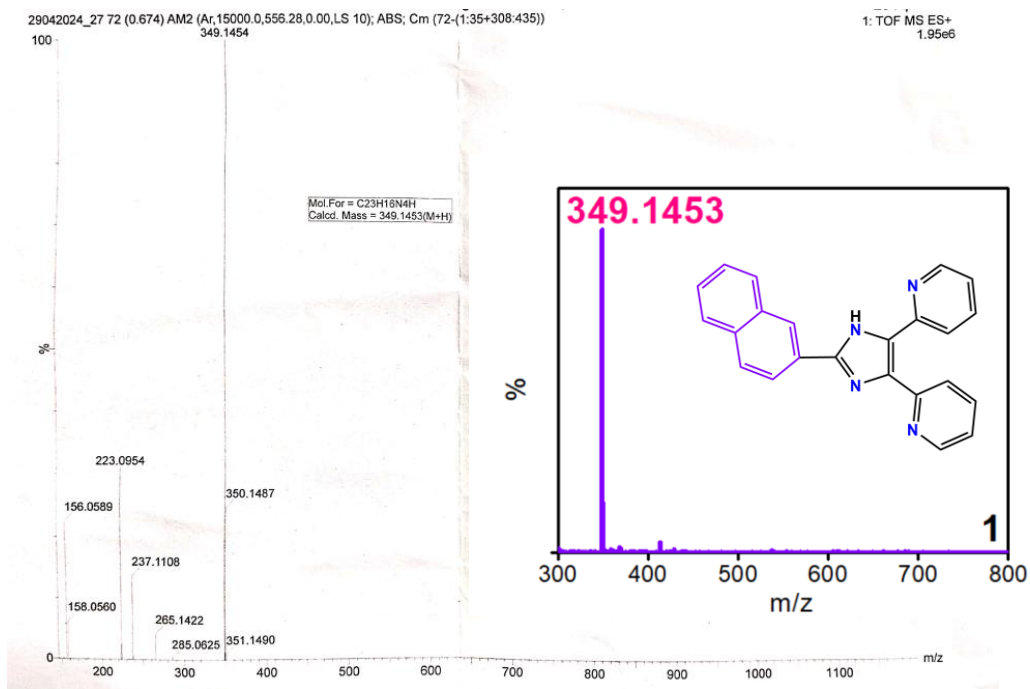

**Fig. S14** HRMS spectrum (positive) of **1** ( $m/z=349.1453$ ) in MeCN.

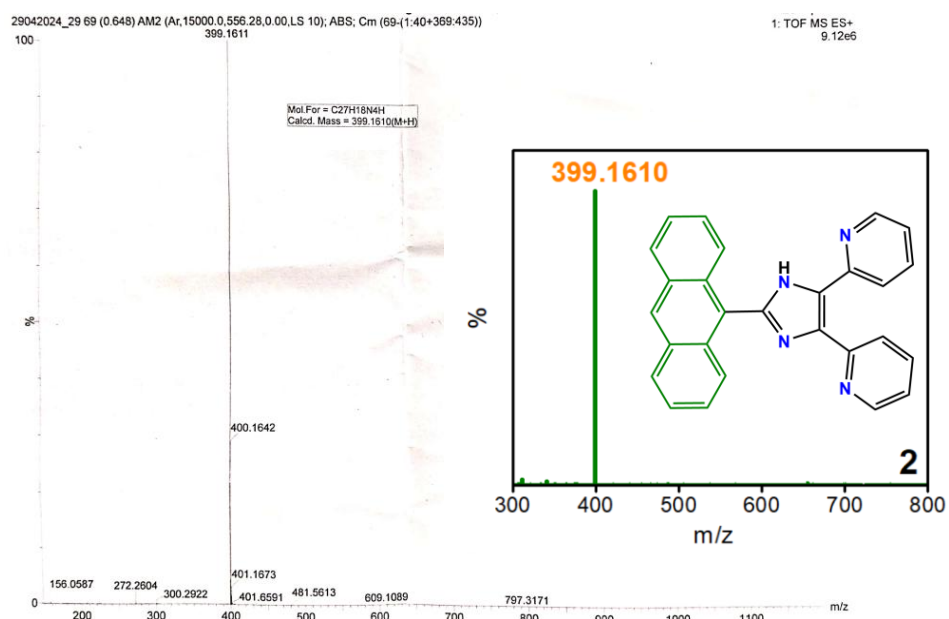

**Fig. S15** HRMS spectrum (positive) of **2** ( $m/z=399.1610$ ) in MeCN.

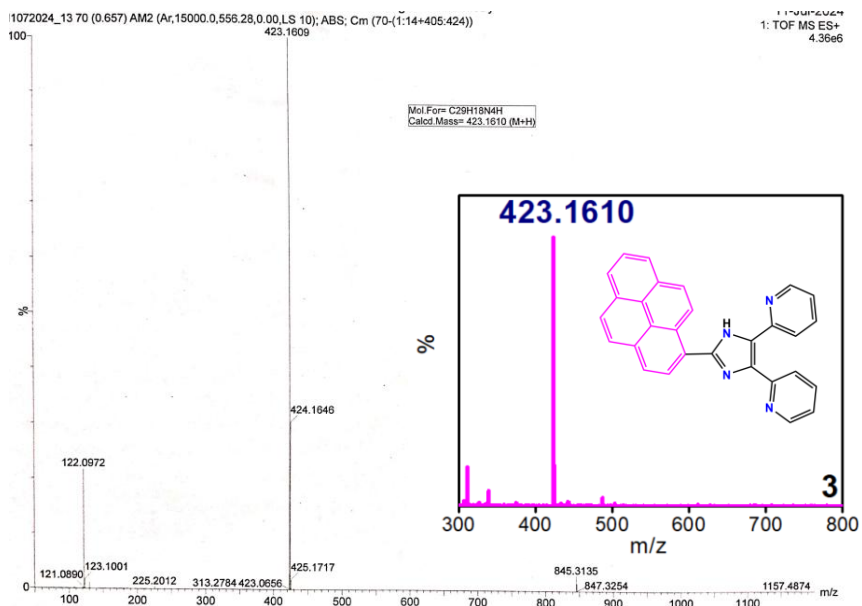

**Fig. S16** HRMS spectrum (positive) of **3** ( $m/z=423.1610$ ) in MeCN.

**Table S1** Composition table of compound **1**

| MO     | <i>py-imz-naphthalene (1)</i> |                   |           |         |
|--------|-------------------------------|-------------------|-----------|---------|
|        | Energy/ev                     | % of compositions |           |         |
|        |                               | Naphthalene       | imidazole | pyridil |
| LUMO+5 | 0.05                          | 17.28             | 6.47      | 76.24   |
| LUMO+4 | -0.53                         | 5.44              | 1.59      | 92.95   |
| LUMO+3 | -0.60                         | 1.01              | 1.37      | 97.61   |
| LUMO+2 | -0.76                         | 75.26             | 9.11      | 15.62   |
| LUMO+1 | -1.38                         | 59.29             | 14.28     | 26.41   |
| LUMO   | -1.61                         | 23.58             | 25.71     | 50.70   |
| HOMO   | -5.44                         | 31.98             | 42.72     | 25.28   |
| HOMO-1 | -6.16                         | 80.91             | 7.99      | 11.09   |
| HOMO-2 | -6.82                         | 49.91             | 14.47     | 35.61   |
| HOMO-3 | -6.96                         | 0.10              | 7.41      | 92.48   |
| HOMO-4 | -7.03                         | 28.51             | 20.65     | 50.82   |
| HOMO-5 | -7.34                         | 0.29              | 14.88     | 84.81   |

**Table S2** Composition table of compound **2**

| MO     | <i>py-imz-anthracene (2)</i> |                   |         |           |
|--------|------------------------------|-------------------|---------|-----------|
|        | Energy/ev                    | % of compositions |         |           |
|        |                              | Anthracene        | Pyridil | imidazole |
| LUMO+5 | -0.23                        | 11.16             | 71.43   | 17.40     |
| LUMO+4 | -0.54                        | 92.67             | 6.86    | 0.45      |
| LUMO+3 | -0.56                        | 5.91              | 92.19   | 1.89      |
| LUMO+2 | -0.62                        | 2.79              | 92.83   | 4.37      |
| LUMO+1 | -1.53                        | 2.40              | 71.90   | 25.68     |
| LUMO   | -1.97                        | 94.00             | 2.50    | 3.93      |
| HOMO   | -5.33                        | 73.69             | 9.07    | 17.23     |
| HOMO-1 | -5.91                        | 27.51             | 35.88   | 36.60     |
| HOMO-2 | -6.71                        | 99.36             | 0.26    | 0.36      |
| HOMO-3 | -6.94                        | 10.31             | 59.69   | 29.97     |
| HOMO-4 | -6.96                        | 00.37             | 90.74   | 8.87      |
| HOMO-5 | -7.10                        | 88.61             | 8.46    | 2.91      |

**Table S3** Composition table of compound **3**

| MO     | <i>py-imz-pyrene (3)</i> |                   |        |           |
|--------|--------------------------|-------------------|--------|-----------|
|        | Energy/ev                | % of compositions |        |           |
|        |                          | Pyridyl           | pyrene | imidazole |
| LUMO+5 | -0.31                    | 25.11             | 67.58  | 7.29      |
| LUMO+4 | -0.56                    | 94.87             | 3.41   | 1.71      |
| LUMO+3 | -0.61                    | 95.33             | 1.93   | 2.72      |
| LUMO+2 | -0.90                    | 3.28              | 93.83  | 2.88      |
| LUMO+1 | -1.51                    | 67.40             | 9.33   | 23.26     |
| LUMO   | -1.90                    | 7.44              | 81.34  | 11.21     |
| HOMO   | -5.27                    | 12.71             | 62.58  | 24.70     |
| HOMO-1 | -5.96                    | 27.61             | 45.84  | 26.54     |
| HOMO-2 | -6.49                    | 4.50              | 93.25  | 2.23      |
| HOMO-3 | -6.94                    | 60.76             | 9.90   | 29.32     |
| HOMO-4 | -6.97                    | 90.21             | 0.84   | 8.94      |
| HOMO-5 | -7.05                    | 6.42              | 91.27  | 2.29      |

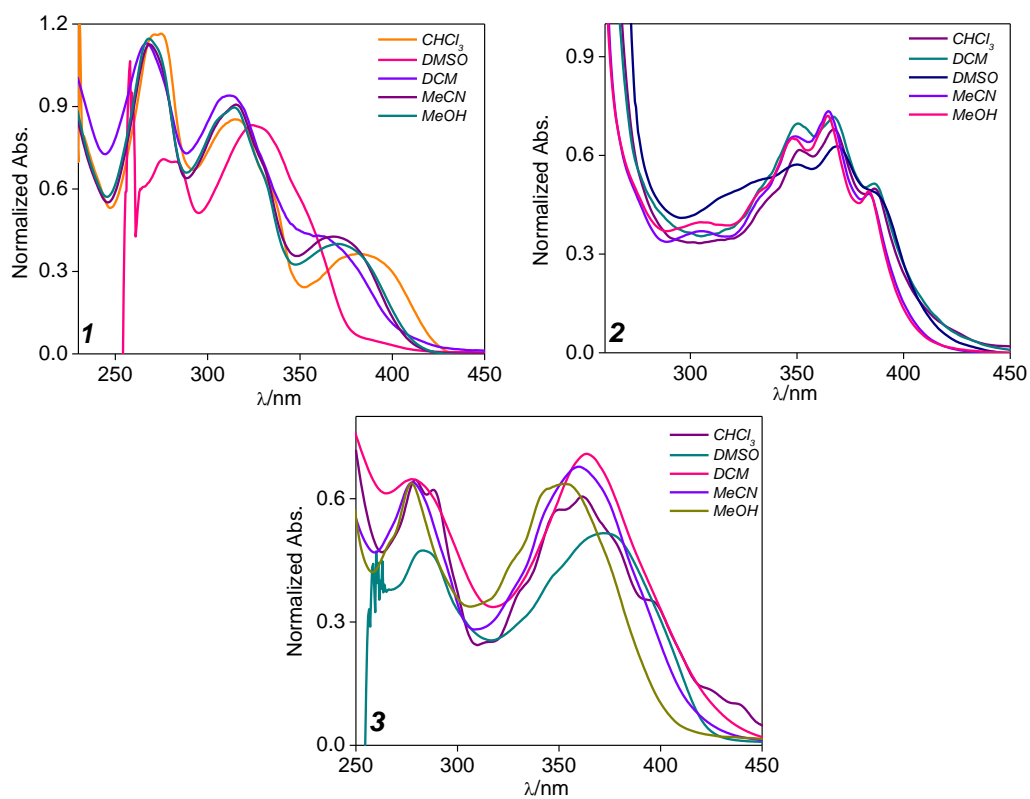

**Fig. S17** UV-vis absorption spectra of **1-3** in different solvents.

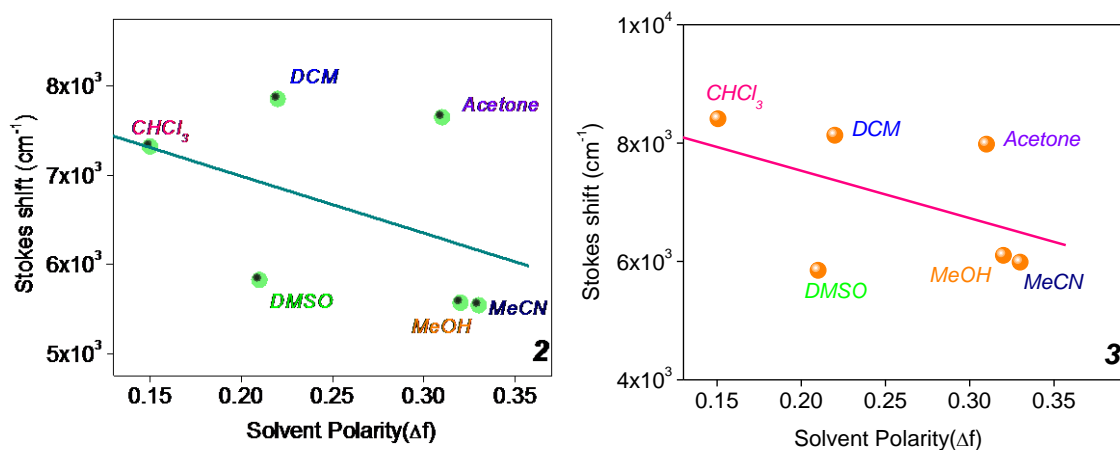

**Fig. S18** Lippert-Mataga plot showing Stokes shift ( $\Delta\nu$ ) against solvent polarity parameter ( $\Delta f$ ) of compound **2** and **3**.

**Table S4** Selected UV-vis energy transitions at the TD-DFT/B3LYP level of **1** in MeCN

| $\lambda_{\text{exp}}$<br>/nm | Excited State | $\lambda_{\text{cal}}$<br>/nm | Oscillator strength | Key transitions                                    | Character               |
|-------------------------------|---------------|-------------------------------|---------------------|----------------------------------------------------|-------------------------|
| <i>py-imz-naphthalene (1)</i> |               |                               |                     |                                                    |                         |
| 372                           | S1            | 357                           | 0.73                | HOMO→LUMO (98%)                                    | ICT                     |
| 270                           | S9            | 266                           | 0.28                | H-2→LUMO (61%),<br>H-1→L+2 (16%)                   | ICT,<br>$\pi$ - $\pi^*$ |
| 225                           | S24           | 225                           | 0.09                | H-2→L+3 (16%),<br>HOMO→L+6 (13%),<br>H-6→L+1 (10%) | ICT,<br>$\pi$ - $\pi^*$ |

**Table S5** Selected UV-vis energy transitions at the TD-DFT/B3LYP level of **2** in MeCN

| $\lambda_{\text{exp}}$<br>/nm | Excited State | $\lambda_{\text{cal}}$<br>/nm | Oscillator strength | Key transitions | Character       |
|-------------------------------|---------------|-------------------------------|---------------------|-----------------|-----------------|
| <i>py-imz-anthracene (2)</i>  |               |                               |                     |                 |                 |
| 384                           | S1            | 419                           | 0.26                | H→L (98%)       | $\pi$ - $\pi^*$ |
| 348                           | S5            | 313                           | 0.05                | H-1→L+1(97%)    | ICT             |
| 253                           | S22           | 242                           | 0.02                | H-5→L+1(76%)    | ICT             |

**Table S6** Selected UV-vis energy transitions at the TD-DFT/B3LYP level of **3** in MeCN

| $\lambda_{\text{exp}}$<br>/nm | Excited<br>State | $\lambda_{\text{cal}}$<br>/nm | Oscillator<br>strength | Key transitions                                               | Character               |
|-------------------------------|------------------|-------------------------------|------------------------|---------------------------------------------------------------|-------------------------|
| <i>py-imz-pyrene (3)</i>      |                  |                               |                        |                                                               |                         |
| 360                           | S1               | 406                           | 0.923                  | HOMO→LUMO (97%)                                               | $\pi$ - $\pi^*$         |
| 278                           | S6               | 296                           | 0.178                  | H→L+2 (11%), H→L+3 (37%),<br>H→L+4 (21%)                      | ICT,<br>$\pi$ - $\pi^*$ |
| 233                           | S29              | 233                           | 0.201                  | H-2→L+2 (35%), H-1→L+6 (16%)                                  | $\pi$ - $\pi^*$         |
| 198                           | S69              | 193                           | 0.186                  | H-9→L+2 (22%), H-8→L+2 (10%),<br>H-5→L+5 (10%), H-5→L+6 (21%) | ICT,<br>$\pi$ - $\pi^*$ |

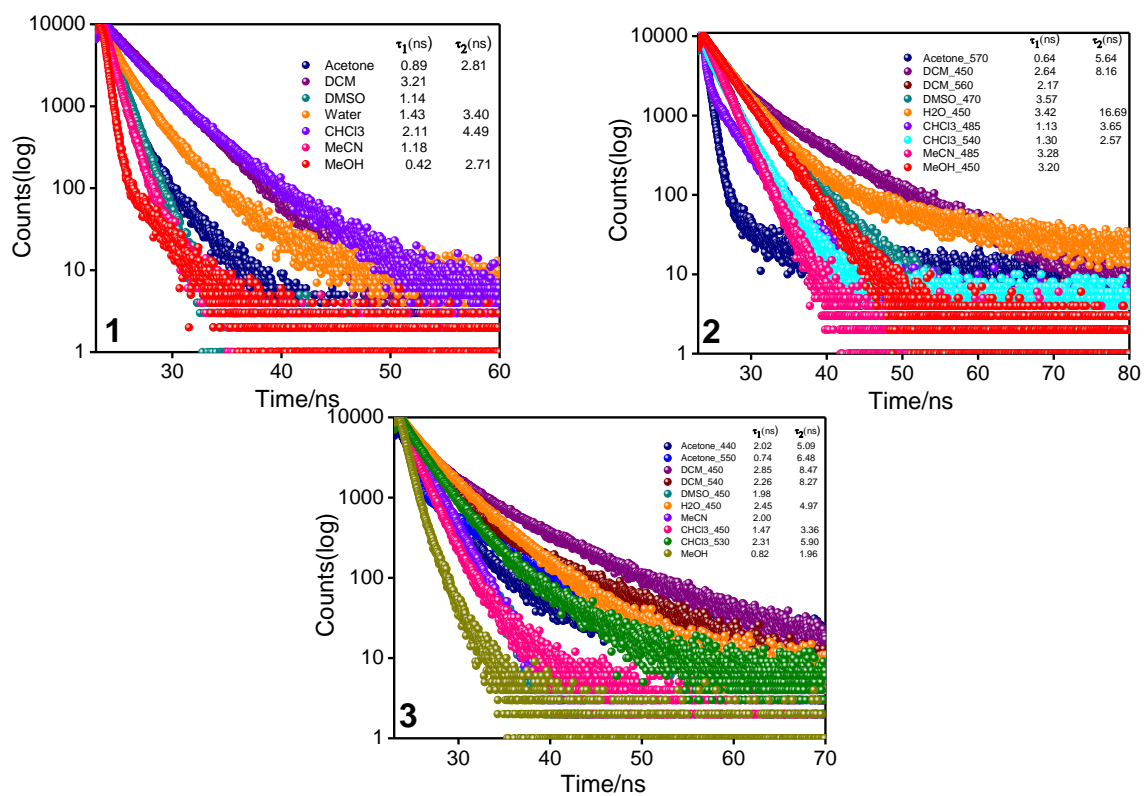

**Fig. S19** Time-resolved emission decays ( $\lambda_{\text{ex}}=370$  nm) of **1-3** in different solvent. The inset represents their lifetimes.

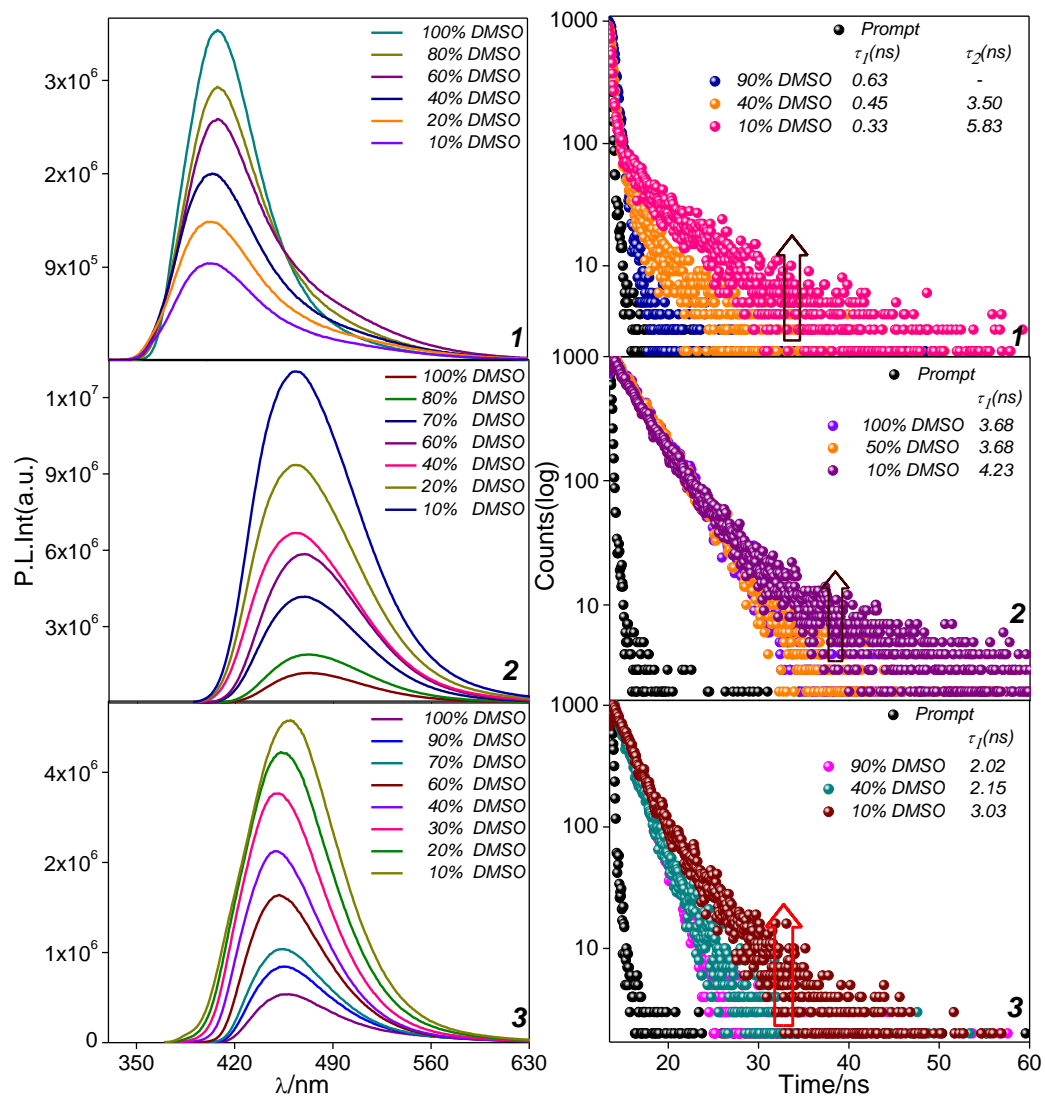

**Fig. S20** Aggregation-induced emission ( $\lambda_{ex}=350$  nm) enhancement upon increasing the ratio of water in DMSO solution of **1-3** (left panel). Corresponding change in emission decays and lifetime is presented in the right panel.

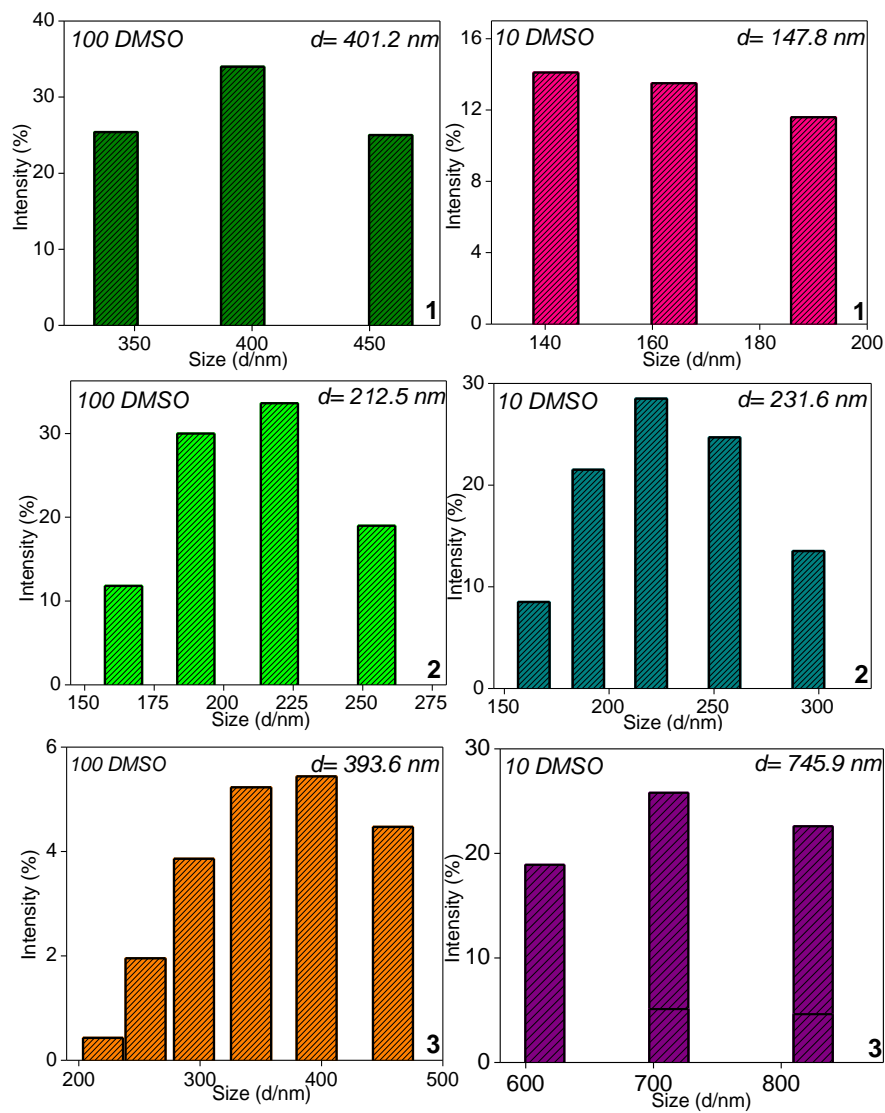

**Fig. S21** DLS data 1-3 in DMSO-H<sub>2</sub>O mixture.

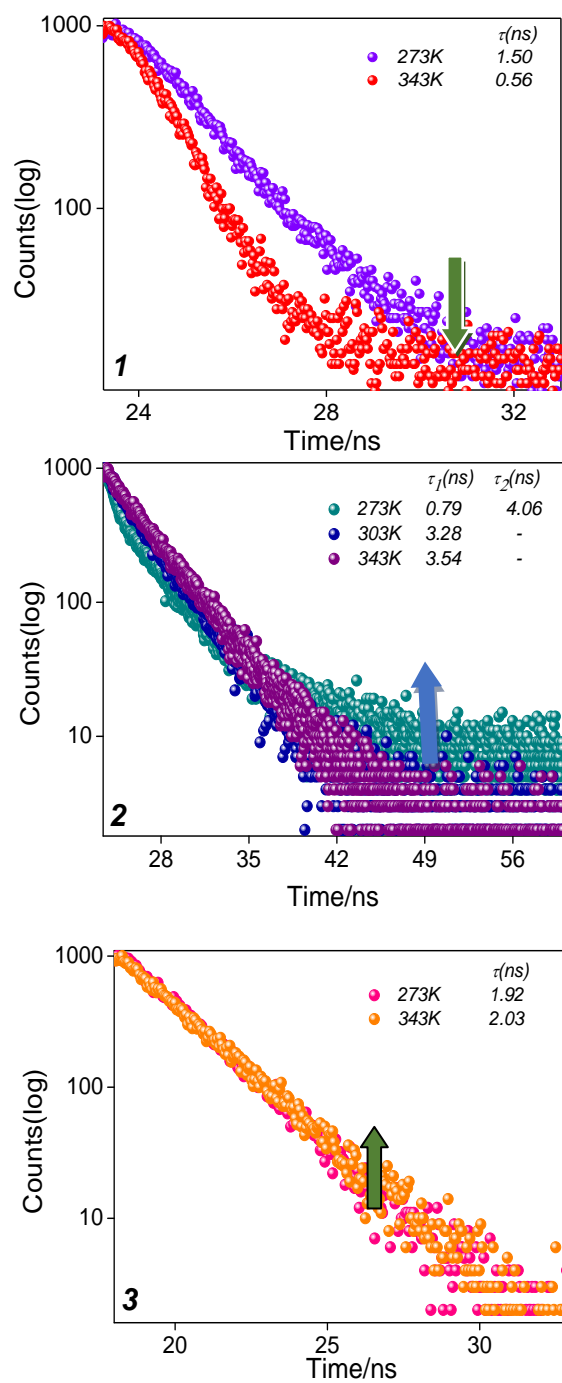

**Fig. S22** Temperature-dependent emission decay profiles ( $\lambda_{\text{ex}} = 370$  nm) of **1-3** in acetonitrile recorded in the temperature range 268K-343K, monitored at their respective emission maxima. The corresponding lifetime values at different temperatures are shown in the insets.

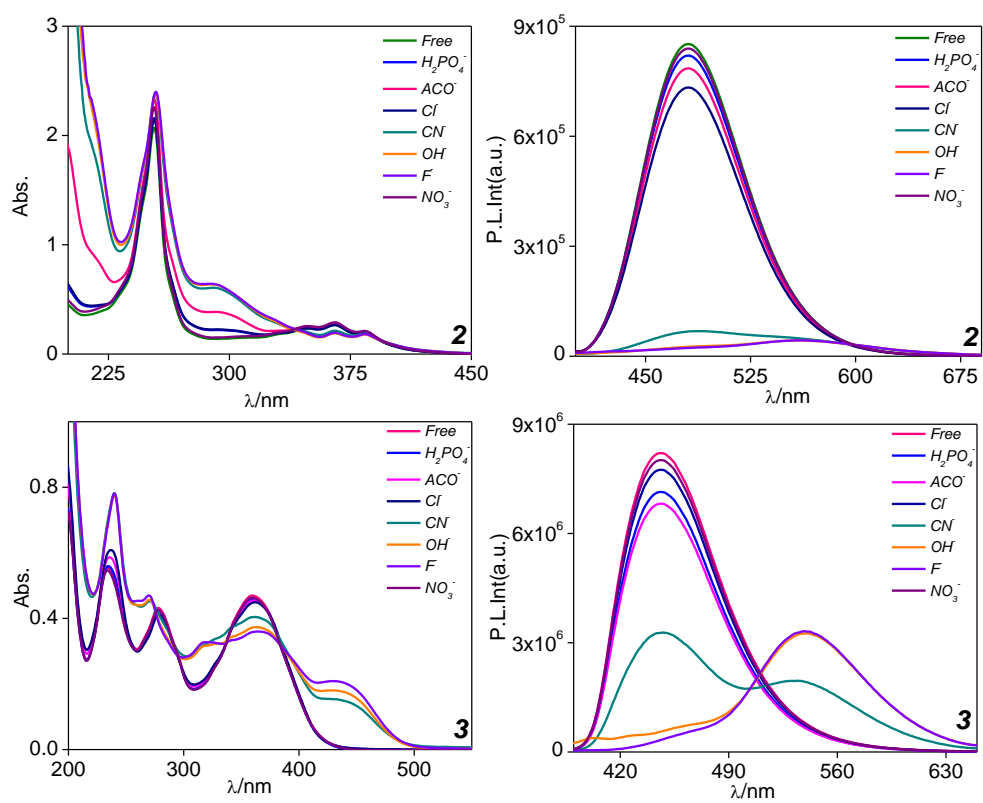

**Fig. S23** Absorption (left panel) and emission (right panel) ( $\lambda_{ex}=370$  nm) spectral response of **2** and **3** in presence of anions.

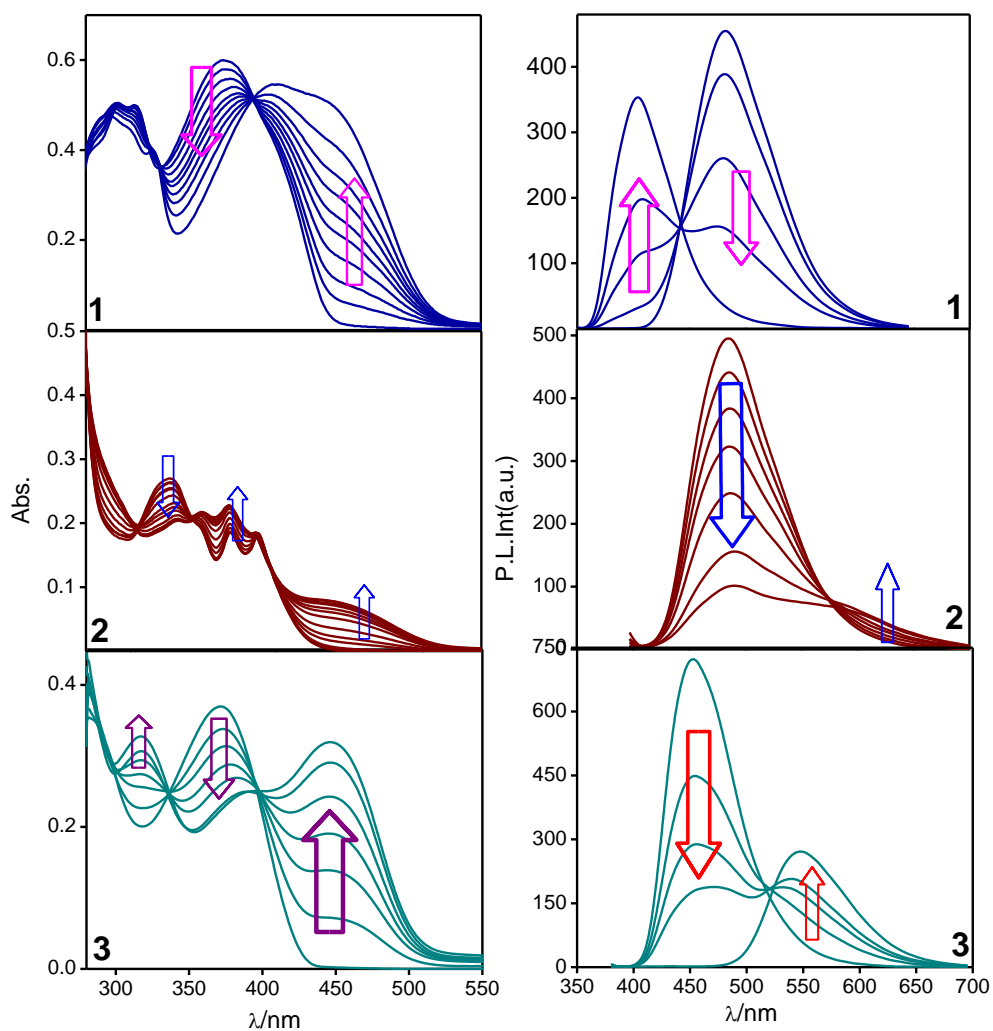

**Fig. S24** Absorption (left panel) and emission ( $\lambda_{\text{ex}}=350$  nm) (right panel) spectral profiles of **1-3** in MeCN upon gradual addition of  $\text{OH}^-$ .

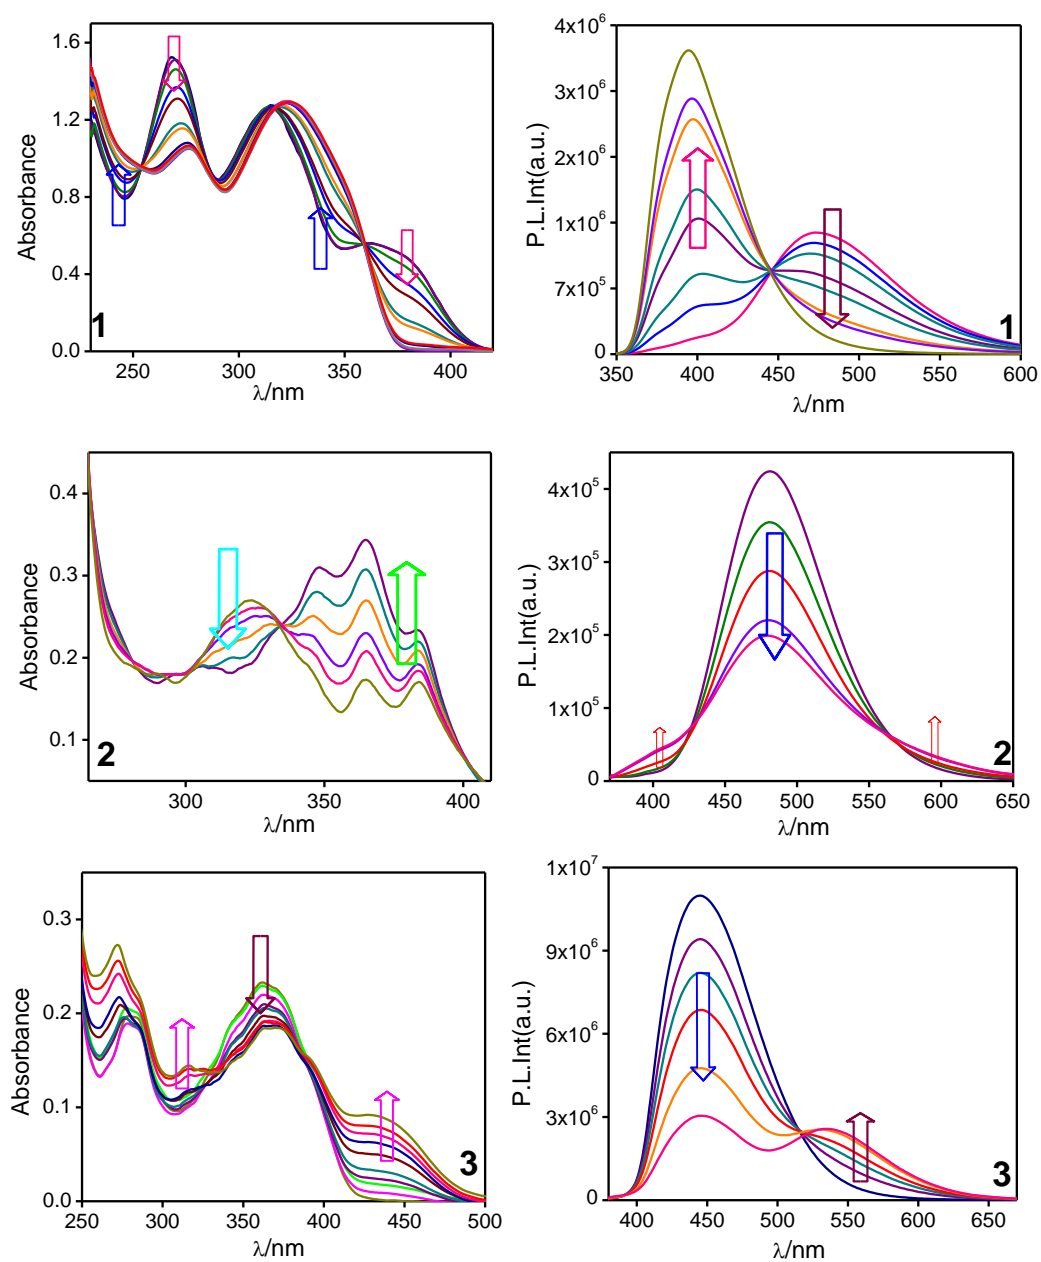

**Fig. S25** Absorption (left panel) and emission ( $\lambda_{\text{ex}}=350$  nm) (right panel) spectral profiles of **1-3** in MeCN upon gradual addition of  $\text{CN}^-$ .

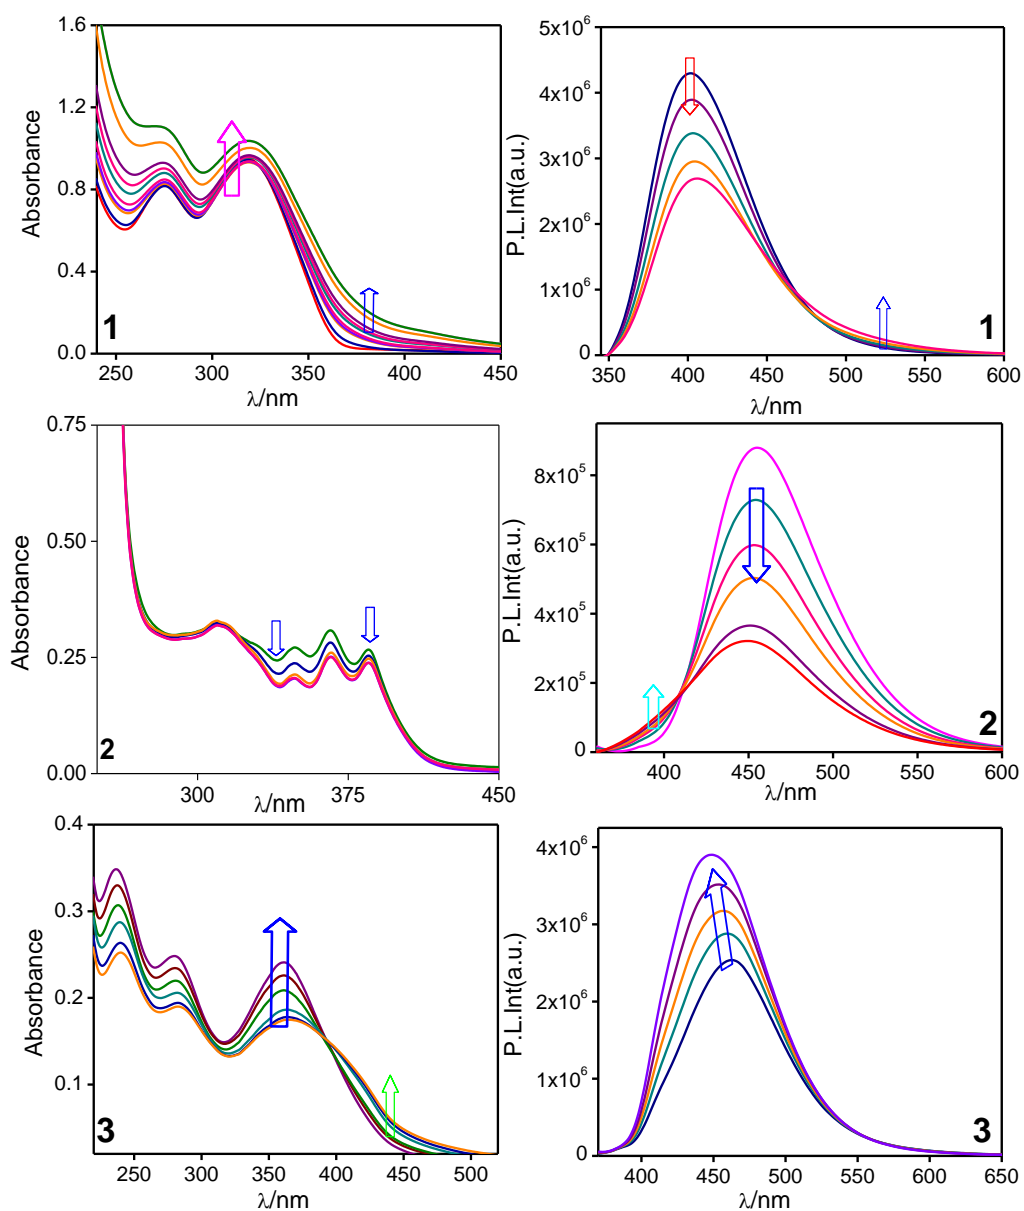

**Fig. S26** Absorption (left panel) and emission ( $\lambda_{\text{ex}}=350$  nm) (right panel) spectral profiles of **1-3** in water upon gradual addition of  $\text{CN}^-$ .

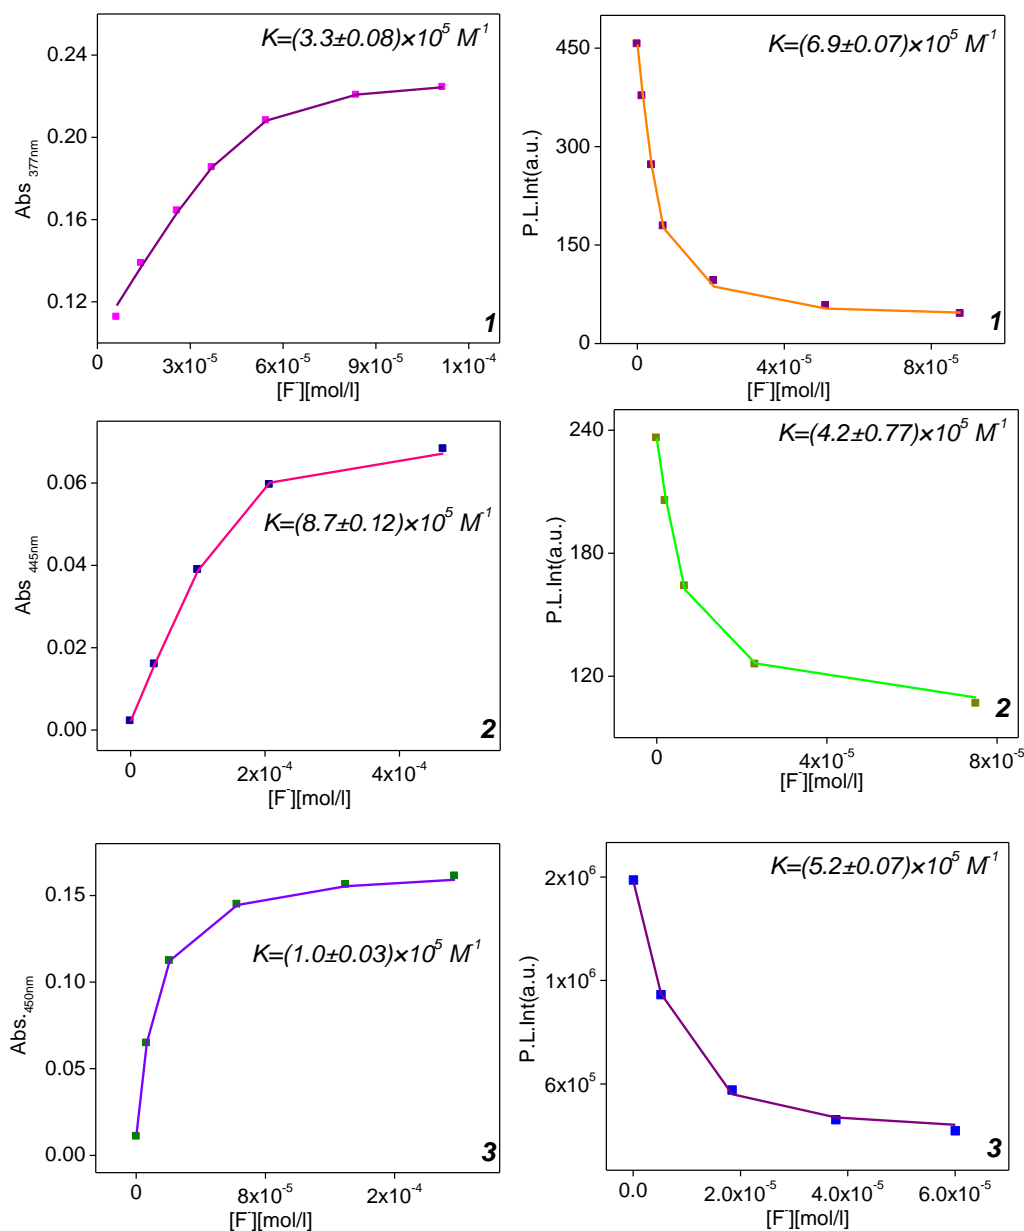

**Fig. S27** Absorption and emission spectral changes during the titration of the receptors **1-3** ( $2.0 \times 10^{-5} \text{ M}$ ) with  $\text{F}^-$  in MeCN. The calculated binding constant of receptor are  $3.3 \times 10^5 \text{ M}^{-1}$  for **1**,  $8.7 \times 10^5 \text{ M}^{-1}$  for **2** and  $1.0 \times 10^5 \text{ M}^{-1}$  for **3** from absorption spectral profiles, while respective value is  $6.9 \times 10^6 \text{ M}^{-1}$ ,  $4.2 \times 10^5 \text{ M}^{-1}$  and  $5.2 \times 10^6 \text{ M}^{-1}$  for emission spectral profiles.

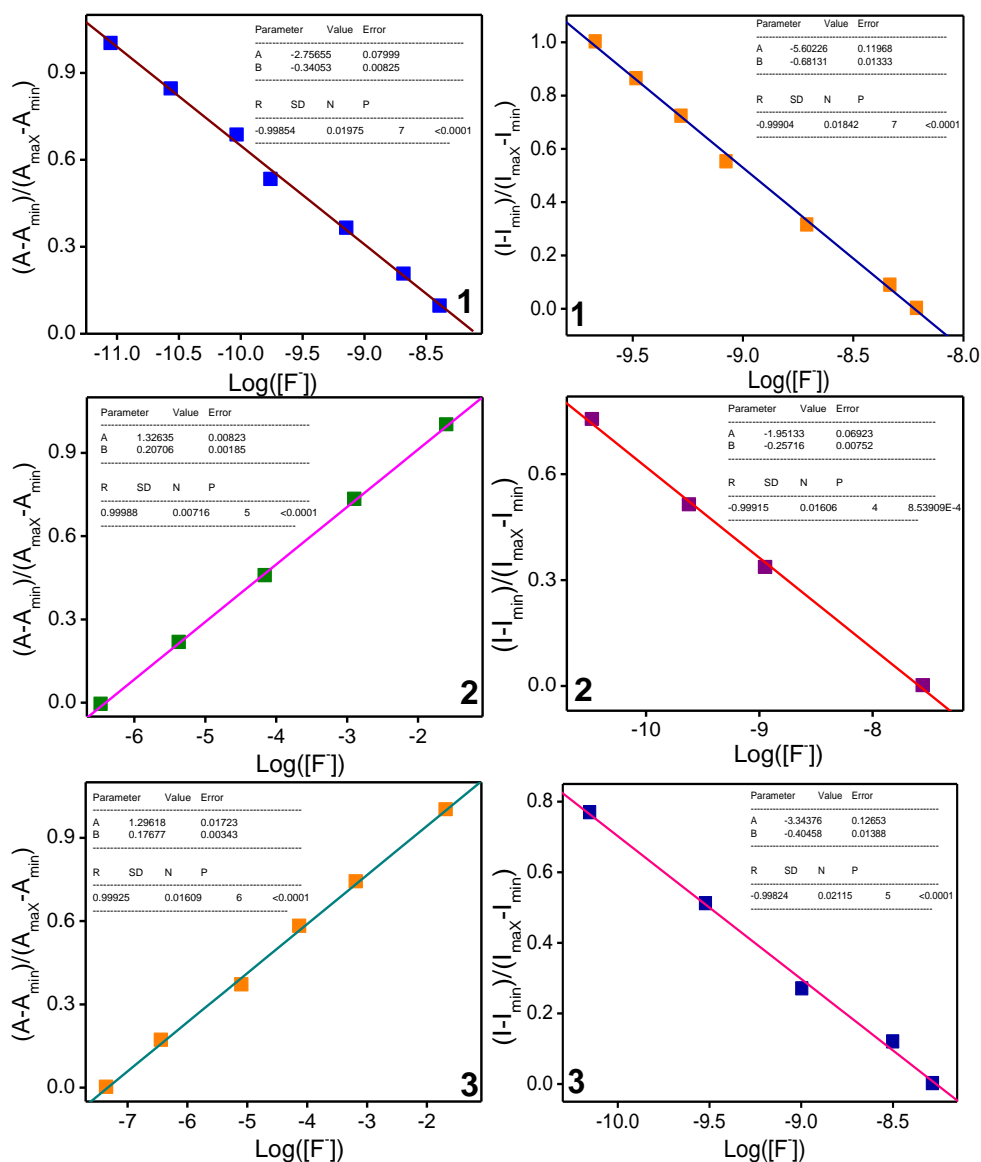

**Fig. S28** Absorption and emission spectral changes during the titration of the receptors **1-3** ( $2.0 \times 10^{-5}$  M) with  $F^-$  in MeCN. (a) Plot of  $(A-A_{min})/(A_{max}-A_{min})$  vs.  $\text{Log}([F^-])$ , gives rise to the detection limit of receptor  $1.58 \times 10^{-8}$  M,  $1.99 \times 10^{-7}$  M and  $3.16 \times 10^{-8}$  M for **1**, **2**, and **3**, respectively. (b) The plot of  $(I-I_{min})/(I_{max}-I_{min})$  vs.  $\text{Log}([F^-])$  provides the detection limit of receptors  $8.31 \times 10^{-9}$  M for **1**,  $5.00 \times 10^{-8}$  M for **2** and  $1.01 \times 10^{-9}$  M for **3**.

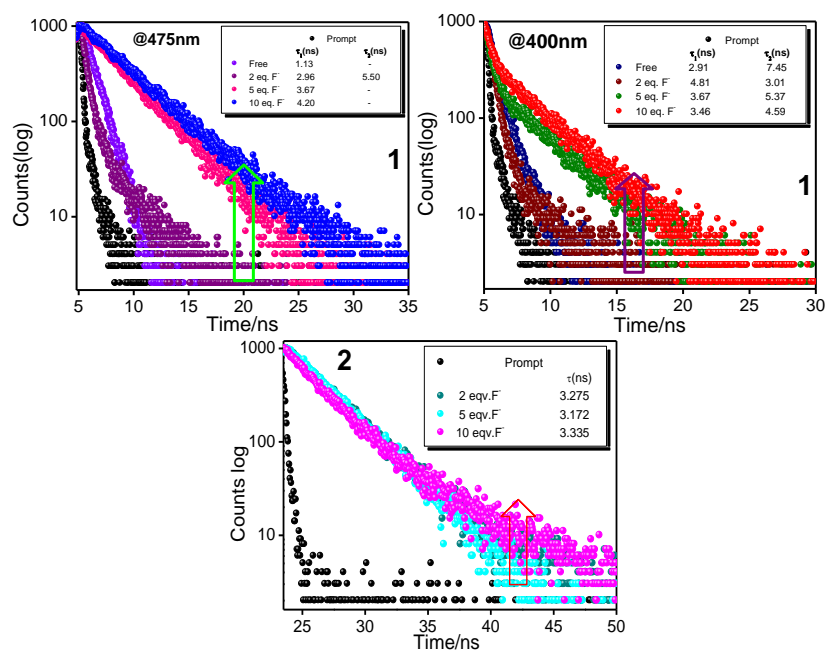

**Fig. S29** The change in the emission decays ( $\lambda_{ex}=370$  nm) of **1** and **2** in acetonitrile upon gradual addition of F<sup>-</sup> upon monitoring at 400 and 475 for **1** and 485 nm for **2**. Lifetimes are provided in the respective inset.

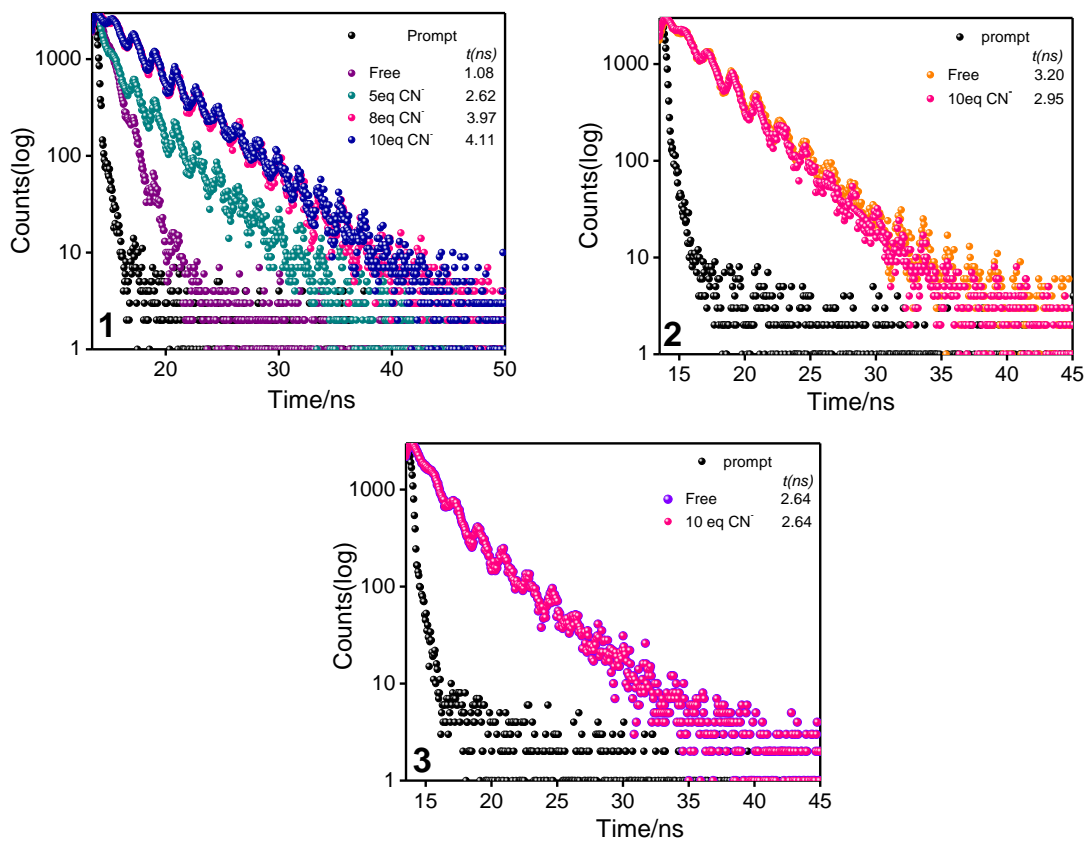

**Fig. S30** The change in the emission decays ( $\lambda_{\text{ex}}=370$  nm) of **1-3** in acetonitrile upon gradual addition of  $\text{CN}^-$  upon monitoring at the respective the emission maxima. Lifetime values are presented in the respective inset.

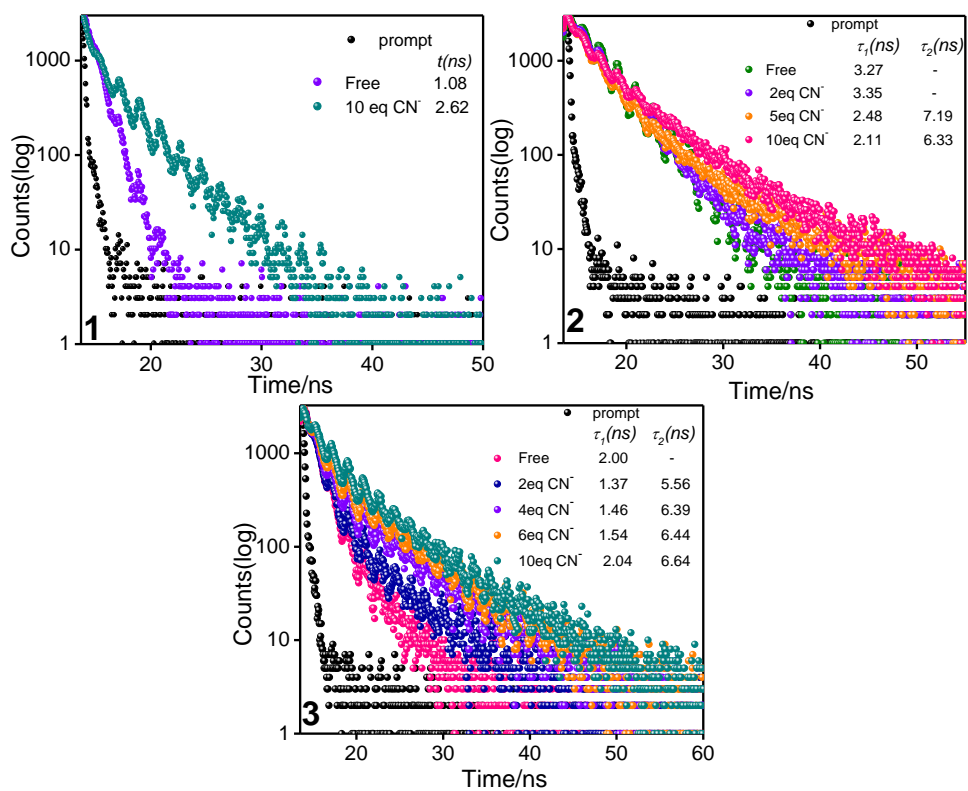

**Fig. S31** The change in the emission decays ( $\lambda_{\text{ex}}=370$  nm) of **1-3** in water upon gradual addition of  $\text{CN}^-$  upon monitoring the emission maxima. Lifetime values are presented in the respective inset.

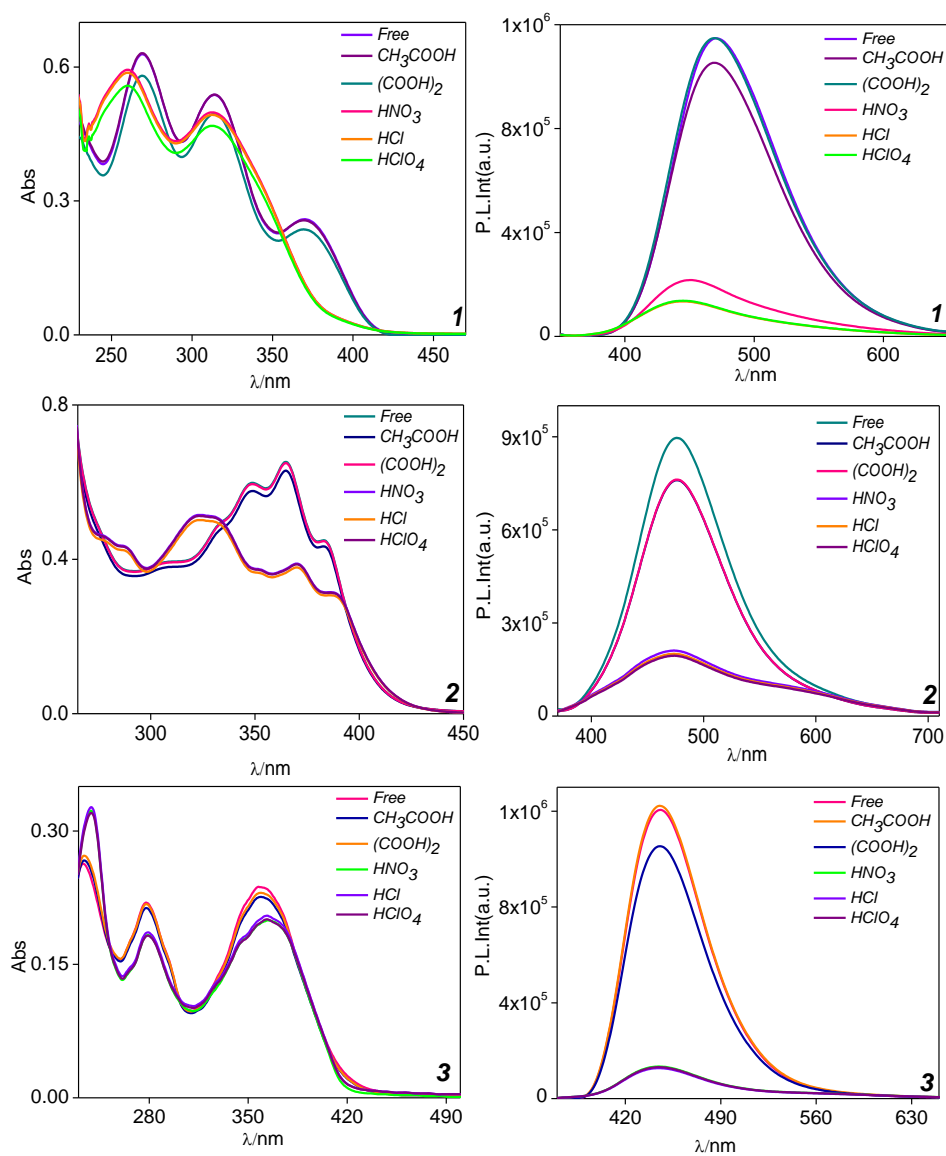

**Fig. S32** Absorption (left column) and emission ( $\lambda_{\text{ex}} = 350$  nm) spectral response of **1-3** in presence of different acids in MeCN.

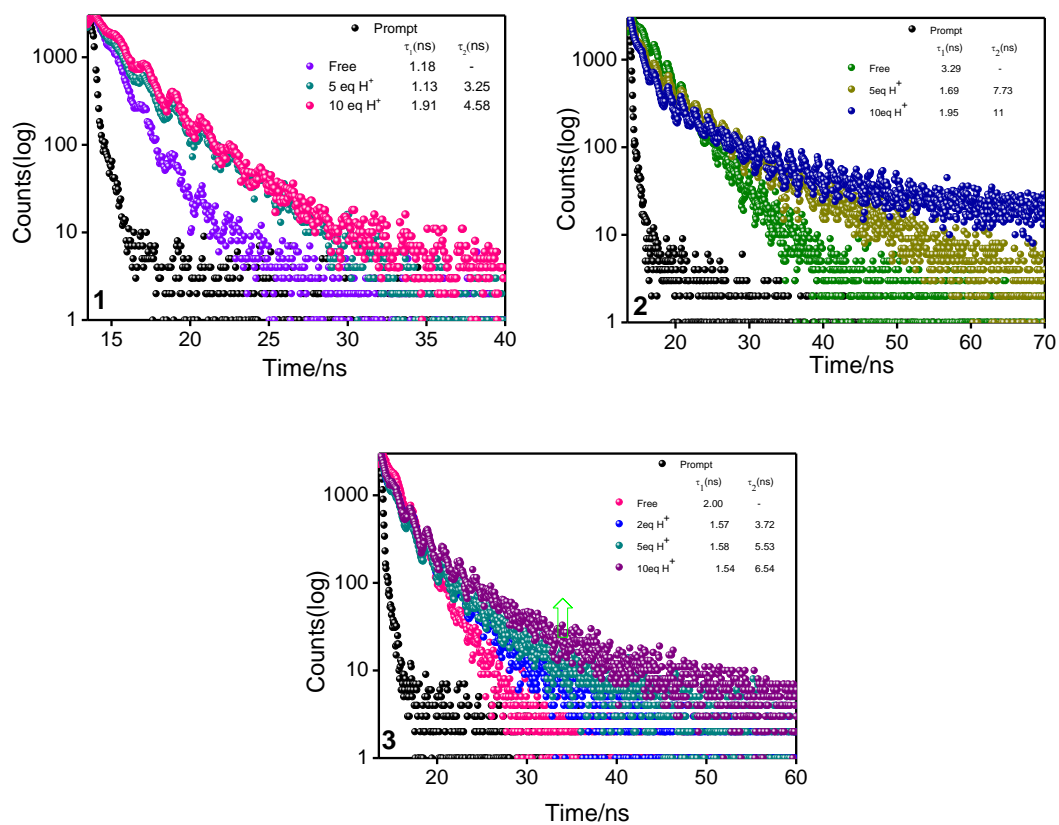

**Fig. S33** The change in the emission decays ( $\lambda_{\text{ex}}=370$  nm) of **1-3** in acetonitrile upon gradual addition of H<sup>+</sup> upon monitoring at their respective emission maxima. Lifetime values are provided in the respective inset.

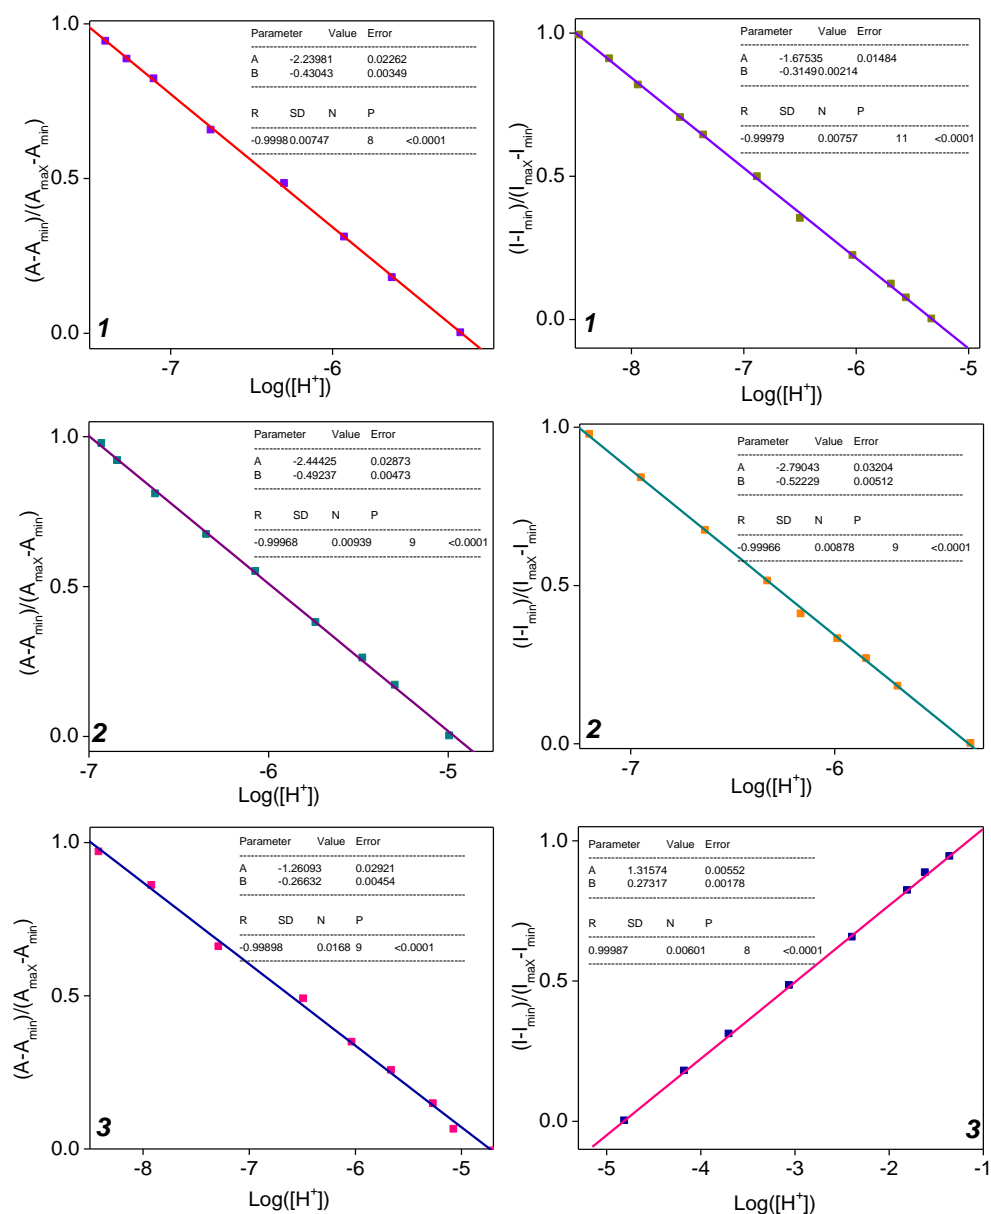

**Fig. S34** Absorption and emission spectral changes during the titration of the receptors **1-3** ( $2.0 \times 10^{-5}$  M) with  $H^+$  in MeCN. Plot of  $(A-A_{min})/(A_{max}-A_{min})$  vs.  $\text{Log}([H^+])$ , gives rise to the detection limit of receptor  $8.3 \times 10^{-6}$  M,  $1.3 \times 10^{-5}$  M and  $1.8 \times 10^{-5}$  M for **1**, **2**, and **3**, respectively. The plot of  $(I-I_{min})/(I_{max}-I_{min})$  vs.  $\text{Log}([H^+])$ , provides the detection limit of receptors  $1.0 \times 10^{-5}$  M for **1**,  $5.00 \times 10^{-6}$  M for **2** and  $7.0 \times 10^{-6}$  M for **3**.

## Notes and references

- (S1) K. Nakamaru, *Bull. Chem. Soc. Jpn.*, 1982, **55**, 1639-1640.
- (S2) A. D. Becke, *J. Chem. Phys.*, 1993, **98**, 5648-5652.
- (S3) C. T. Lee, W. T. Yang, R. G. Parr, *Phys. Rev. B.*, 1988, **37**, 785-789.
- (S4) P. J. Hay, W. R. Wadt, *J. Chem. Phys.*, 1985, **82**, 299-310.
- (S5) M. E. Casida, C. Jamorski, K. C. Casida, D. R. Salahub, *J. Chem. Phys.*, 1998, **108**, 4439-4449.
- (S6) R. E. Stratmann, G. E. Scuseria, M. J. Frisch, *J. Chem. Phys.*, 1998, **109**, 8218-8224.
- (S7) V. A. Walters, C. M. Hadad, Y. Thiel, S. D. Colson, K. B. Wiberg, P. M. Johnson, J. B. Foresman, *J. Am. Chem. Soc.*, 1991, **113**, 4782-4791.
- (S8) M. Caricato, B. Mennucci, J. Tomasi, F. Ingrosso, R. Cammi, S. Corni, G. J. Scalmani, *Chem. Phys.* 2006, **124**, 124520-124533.
- (S9) B. Mennucci, C. Cappelli, C. A. Guido, R. Cammi, J. Tomasi, *J. Phys. Chem. A*, 2009, **113**, 3009-3020.
- (S10) R. I. I. Dennington, T. Keith, J. Millam, *Gauss View 3.*, 2007.
- (S11) N. M. O Boyle, A. L. Tenderholt, K. M. Langner, *J. Comput. Chem.* 2008, **29**, 839-845.
